# Supplementary material for: Modulation of the fluorescence properties of diketopyrrolopyrroles via various electron-rich substituents
Source: Royal Society of Chemistry journal article supplement (doi:10.1039/c5tc03190g), 2015-10-27

## Supplementary Information

# The modulation of fluorescent properties of diketopyrrolopyrroles via various electron-rich substituents

Anna Purc, Marzena Banasiewicz, Eliza Glodkowska-Mrowka and Daniel. T. Gryko

### S1. Optical properties

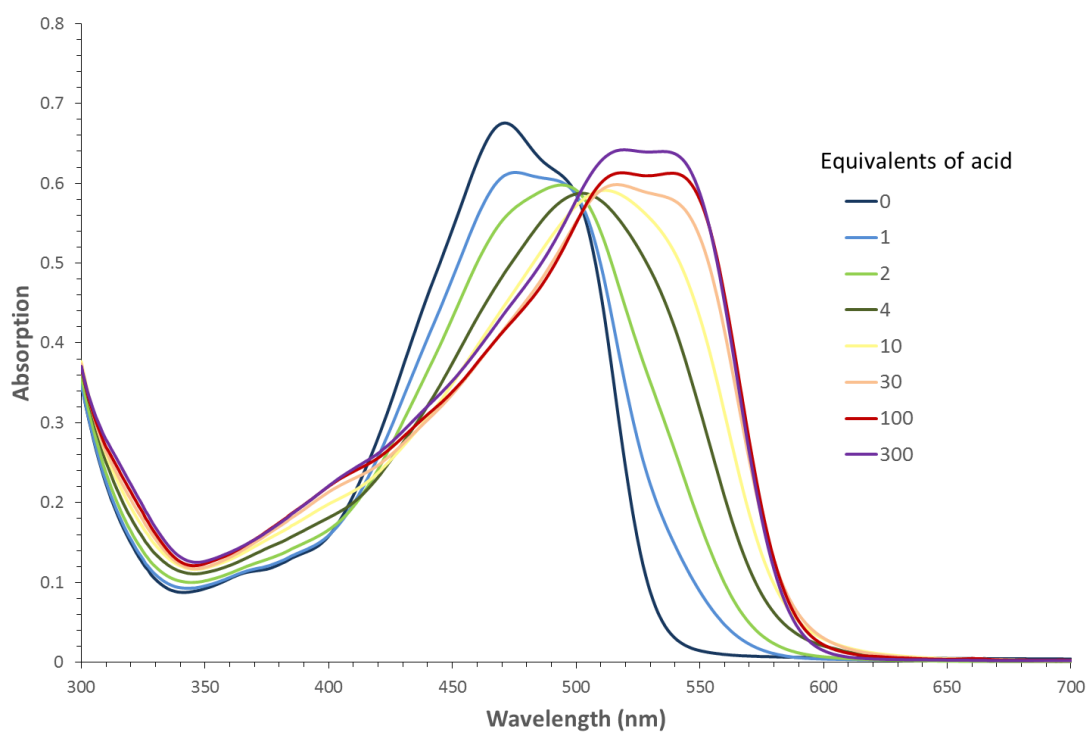

**Fig. S1.1** Titration of compound **8** with TFA.

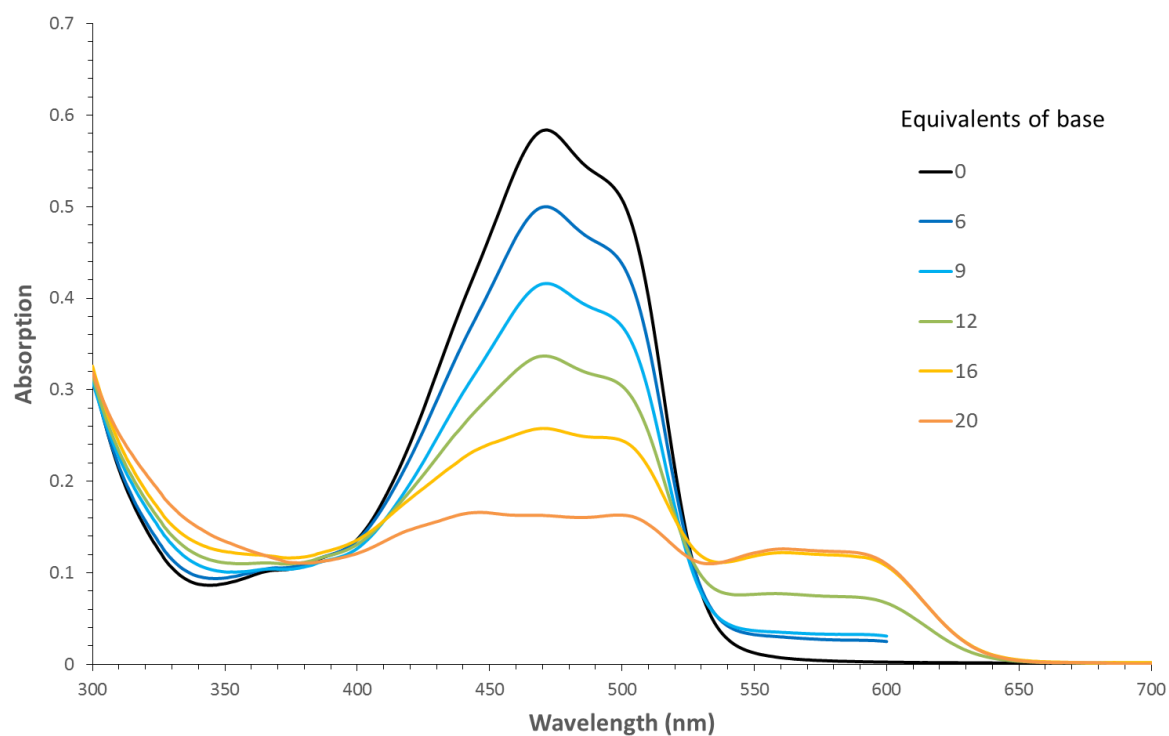

**Fig. S1.2** Titration of compound **8** with benzyltrimethylammonium hydroxide.

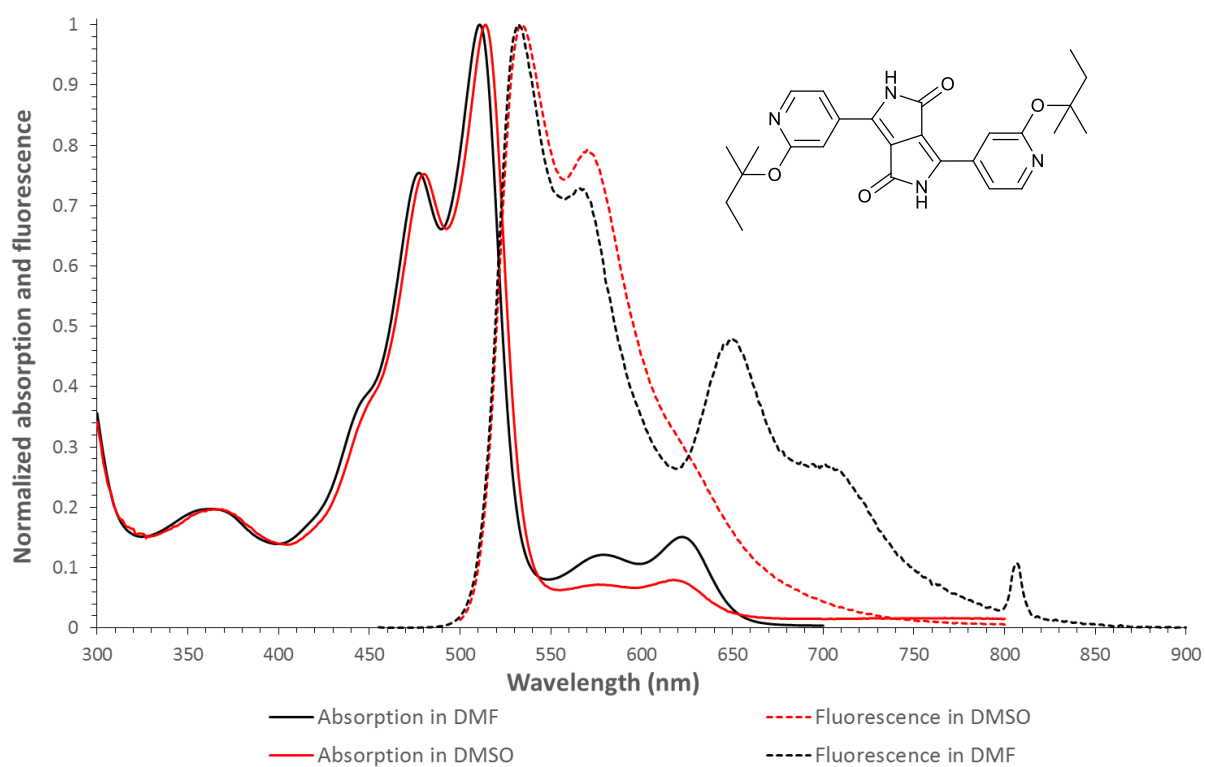

**Fig. S1.3** Normalized absorption and fluorescence of compound **4** in DMF and DMSO.

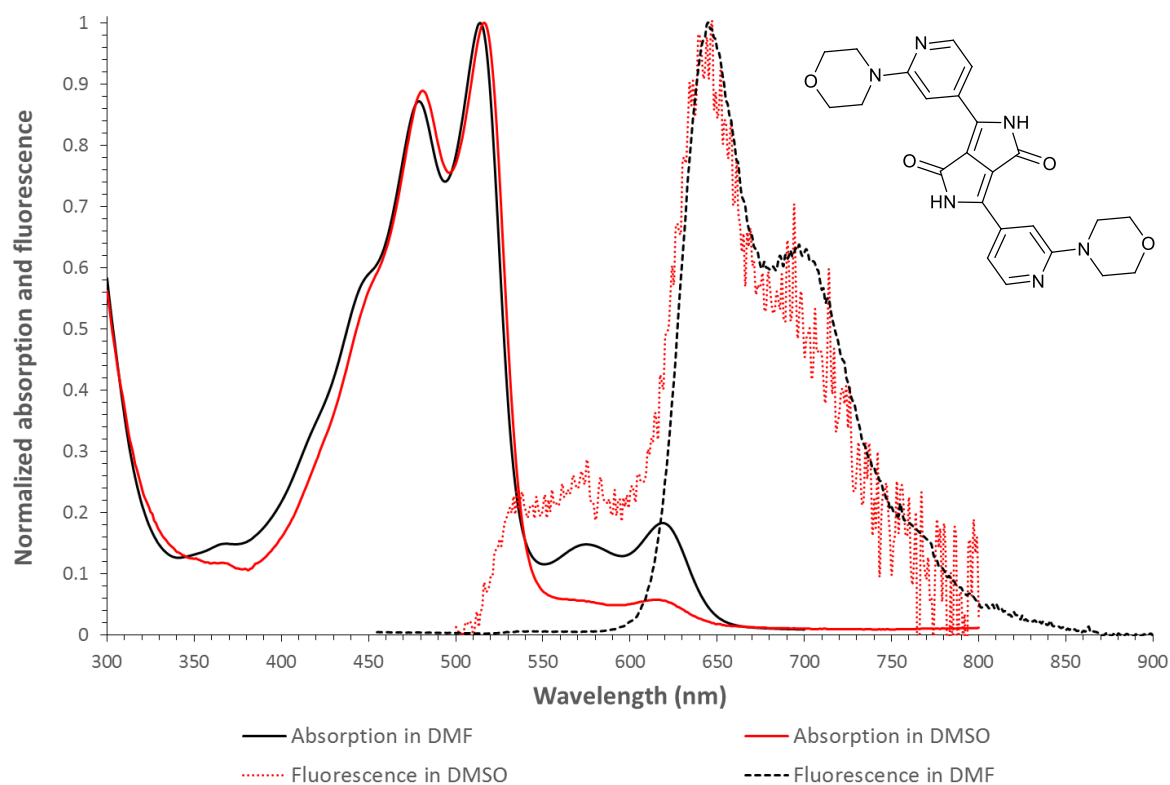

**Fig. S1.4** Normalized absorption and fluorescence of compound **6** in DMF and DMSO.

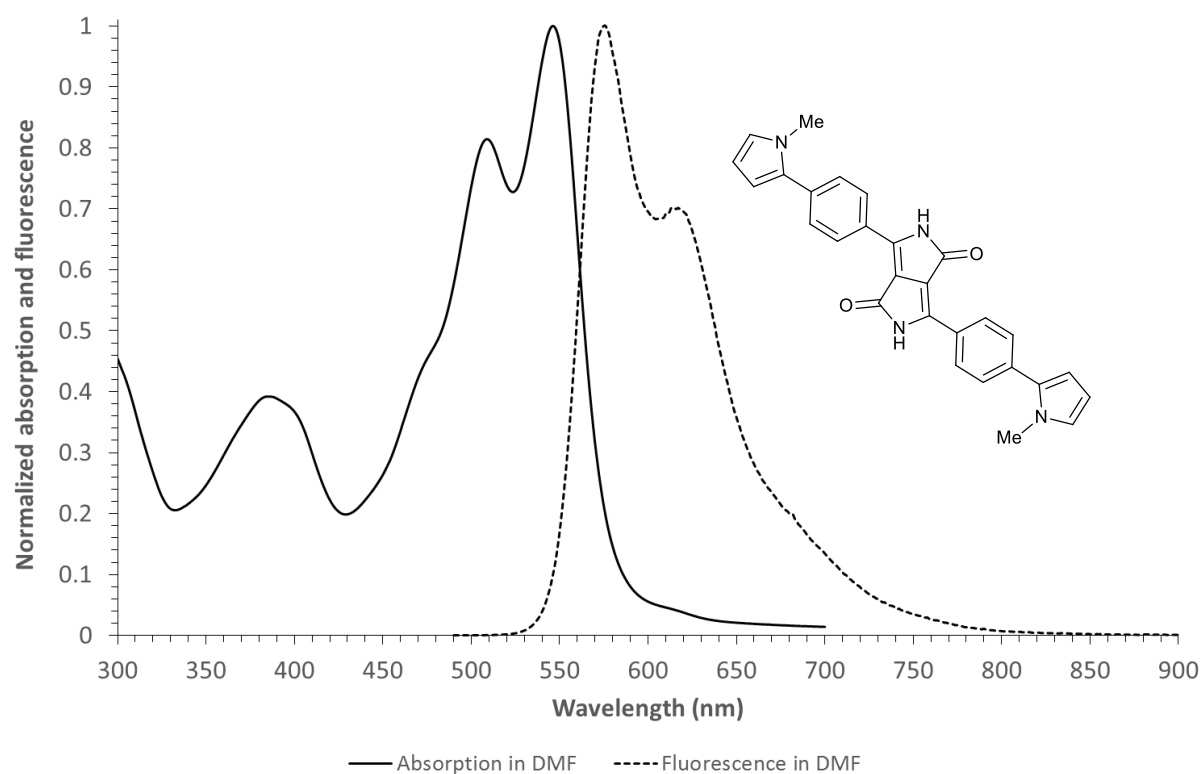

**Fig. S1.5** Normalized absorption and fluorescence of compound **10** in DMF.

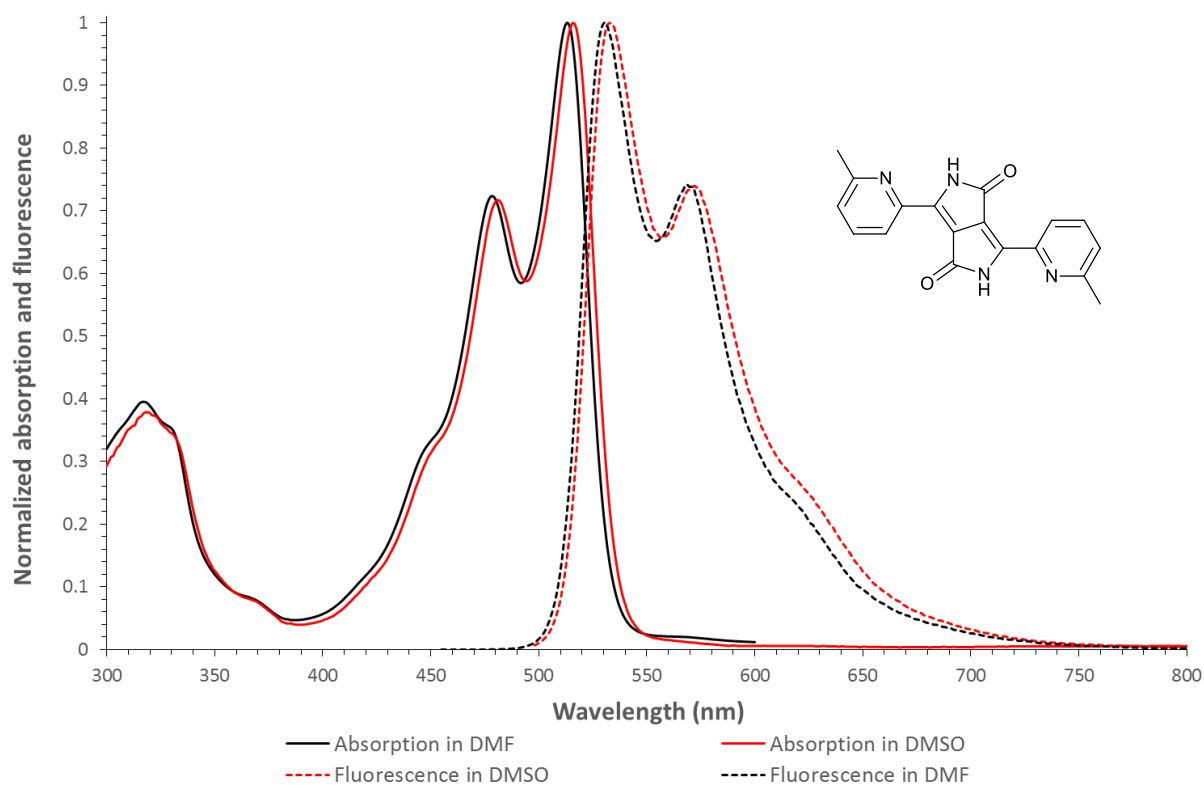

**Fig. S1.6** Normalized absorption and fluorescence of compound **13** in DMF and DMSO.

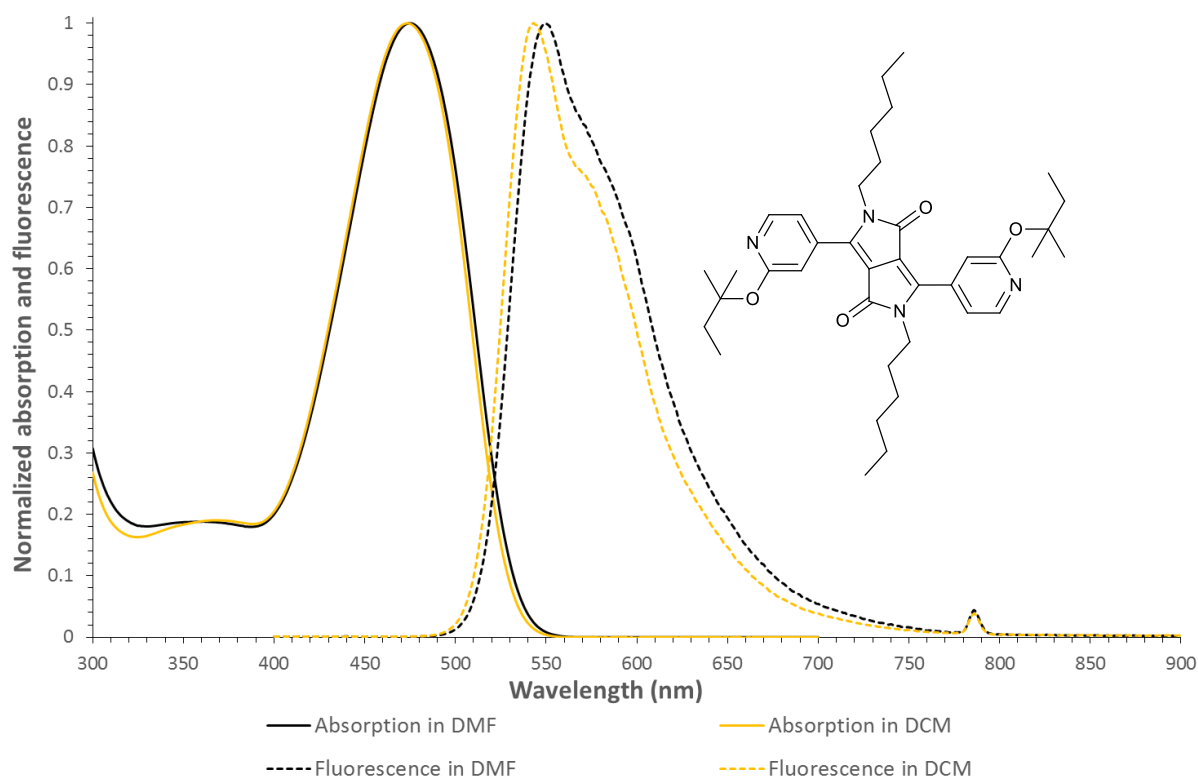

**Fig. S1.7** Normalized absorption and fluorescence of compound **5** in DMF and DCM.

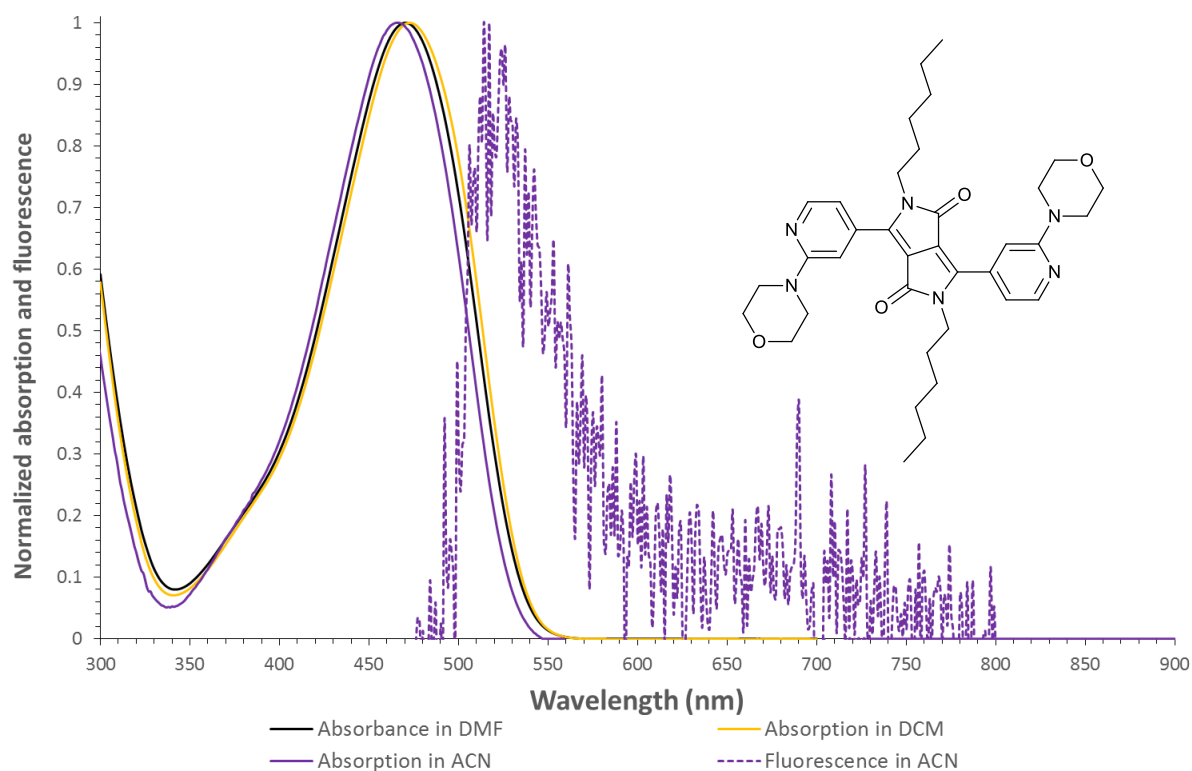

**Fig. S1.8** Normalized absorption and fluorescence of compound **7** in DMF, DCM and acetonitrile.

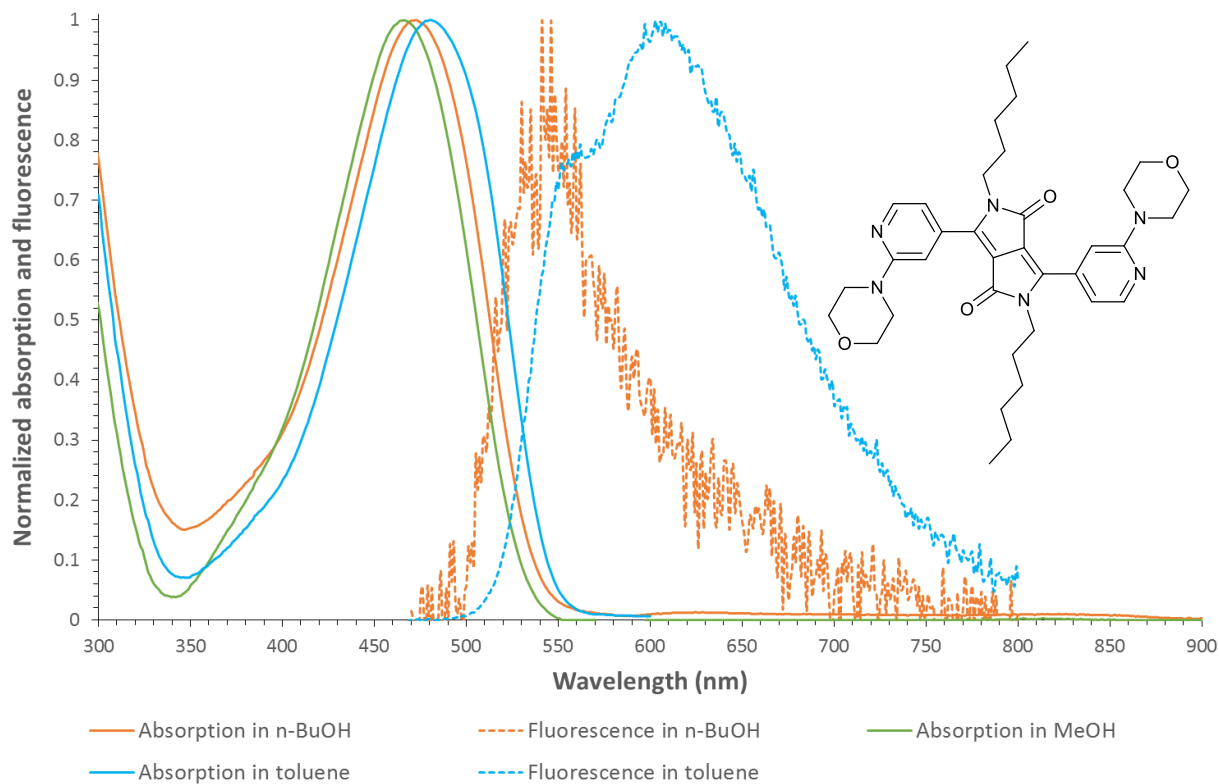

**Fig. S1.9** Normalized absorption and fluorescence of compound **7** in *n*-BuOH, MeOH and toluene.

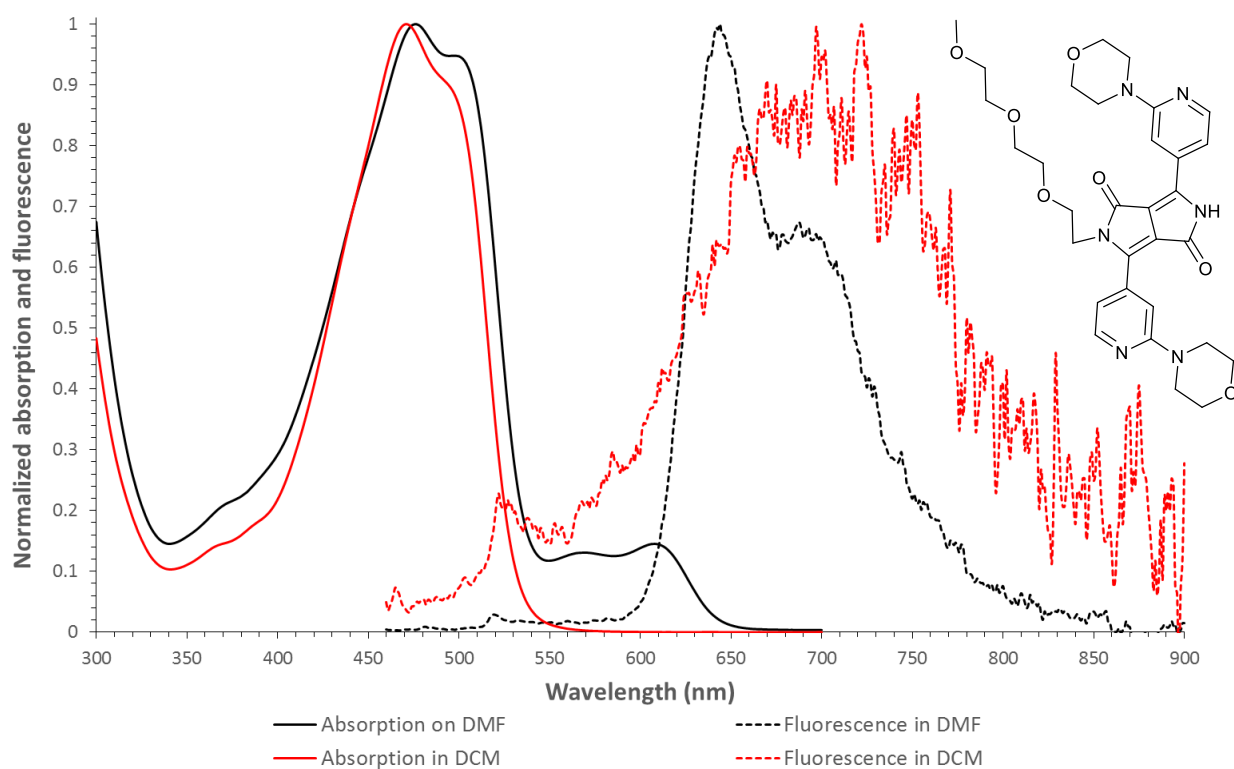

**Fig. S1.10** Normalized absorption and fluorescence of compound **8** in DMF and DCM.

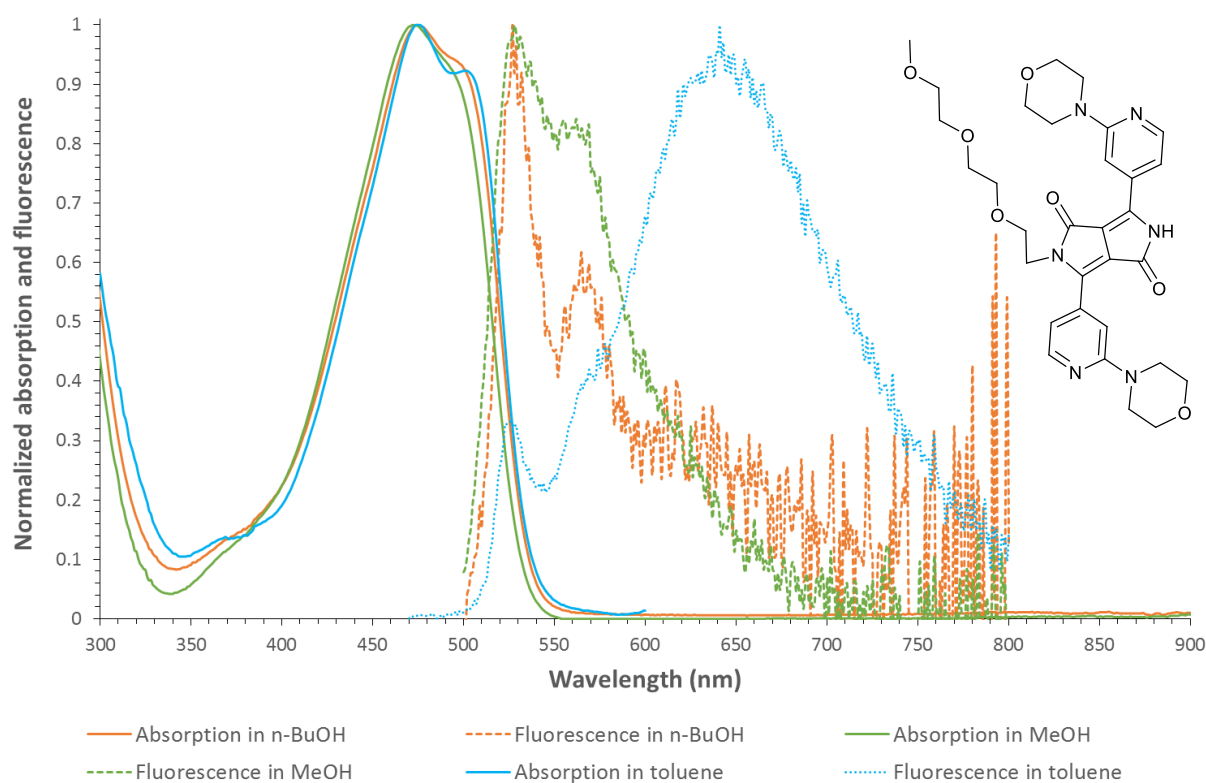

**Fig. S1.11** Normalized absorption and fluorescence of compound **8** in *n*-BuOH, MeOH and toluene.

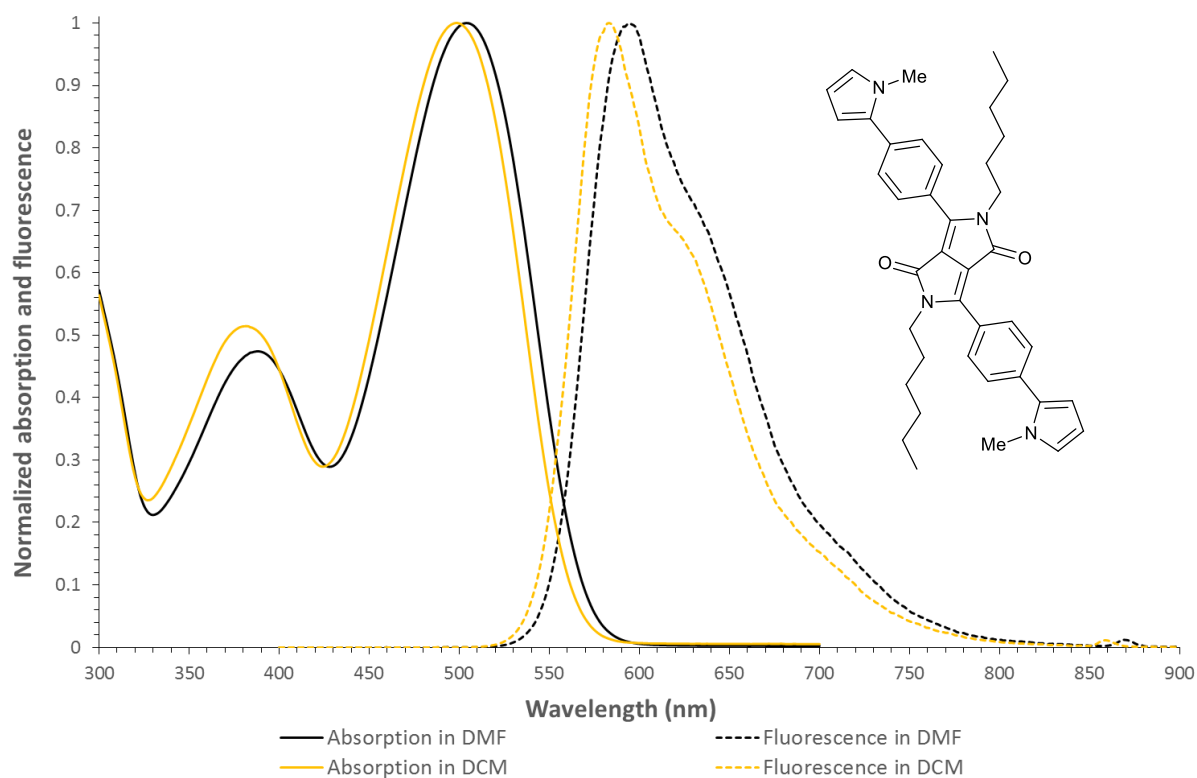

**Fig. S1.12** Normalized absorption and fluorescence of compound 11 in DMF and DCM.

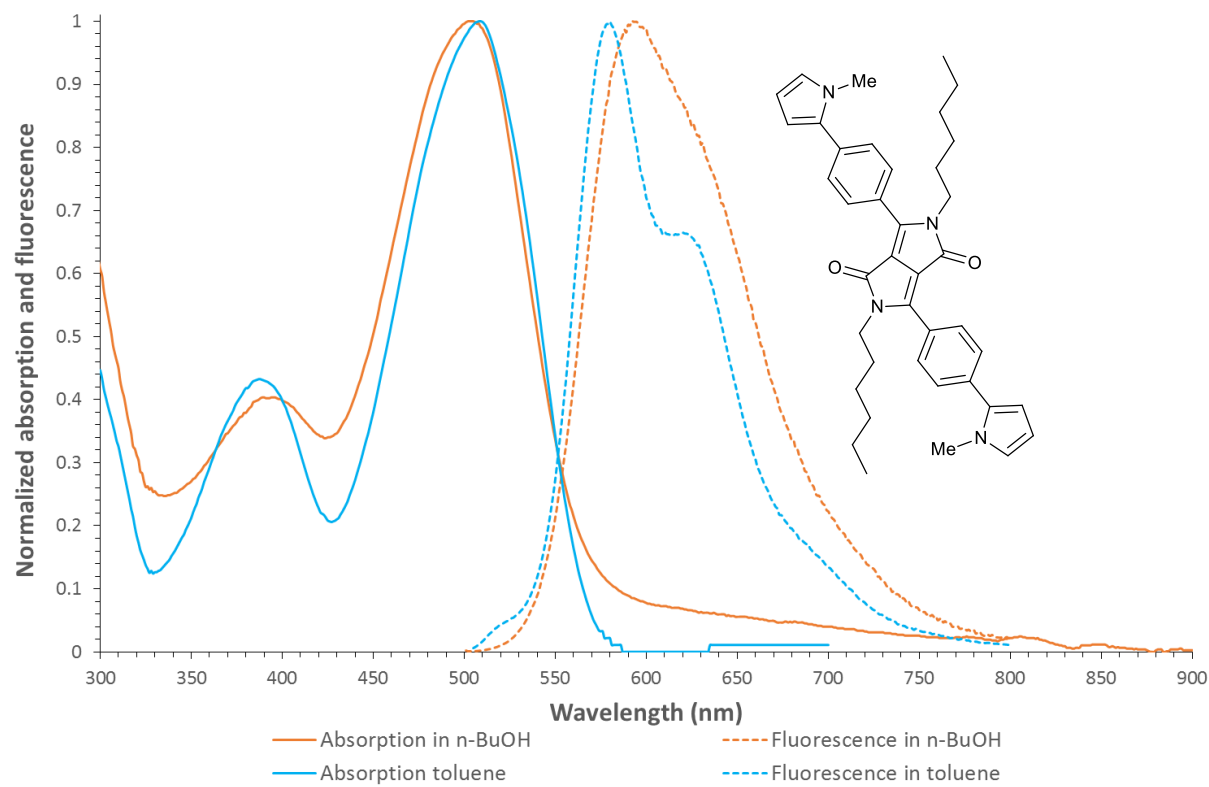

**Fig. S1.13** Normalized absorption and fluorescence of compound 11 in n-BuOH and toluene.

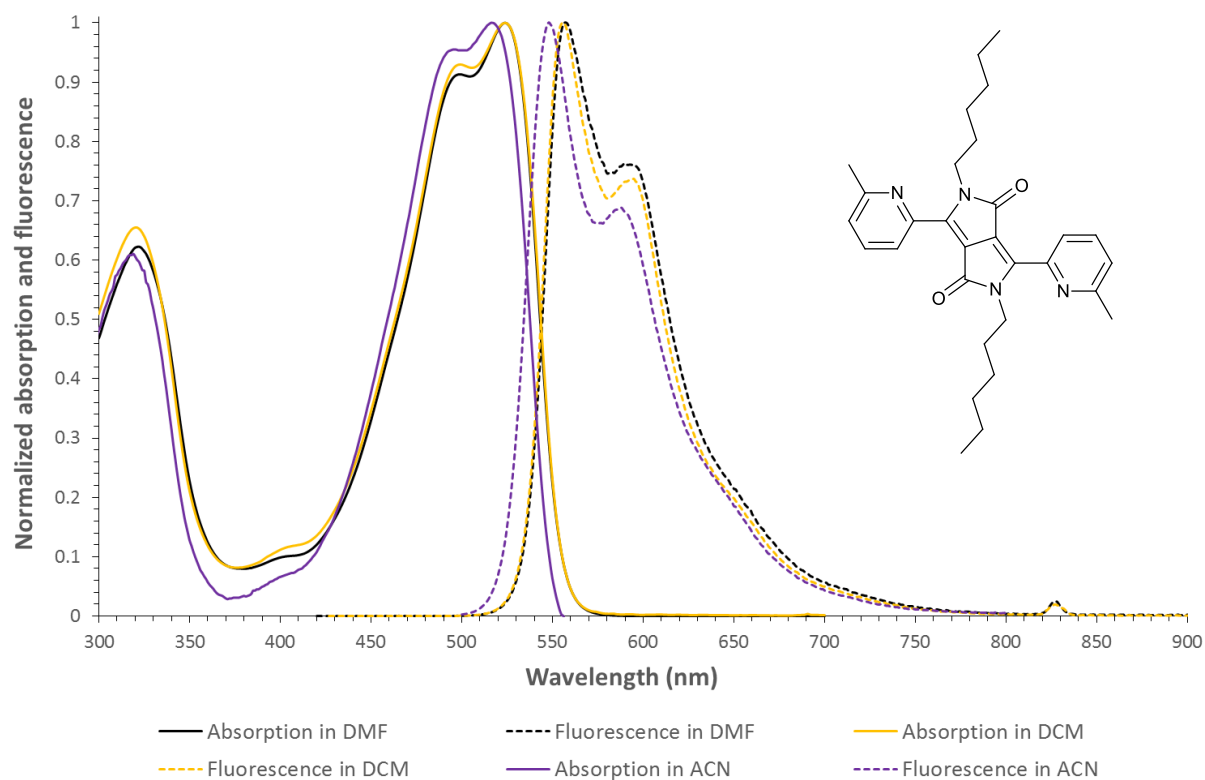

**Fig. S1.14** Normalized absorption and fluorescence of compound **14** in DMF, DCM and acetonitrile.

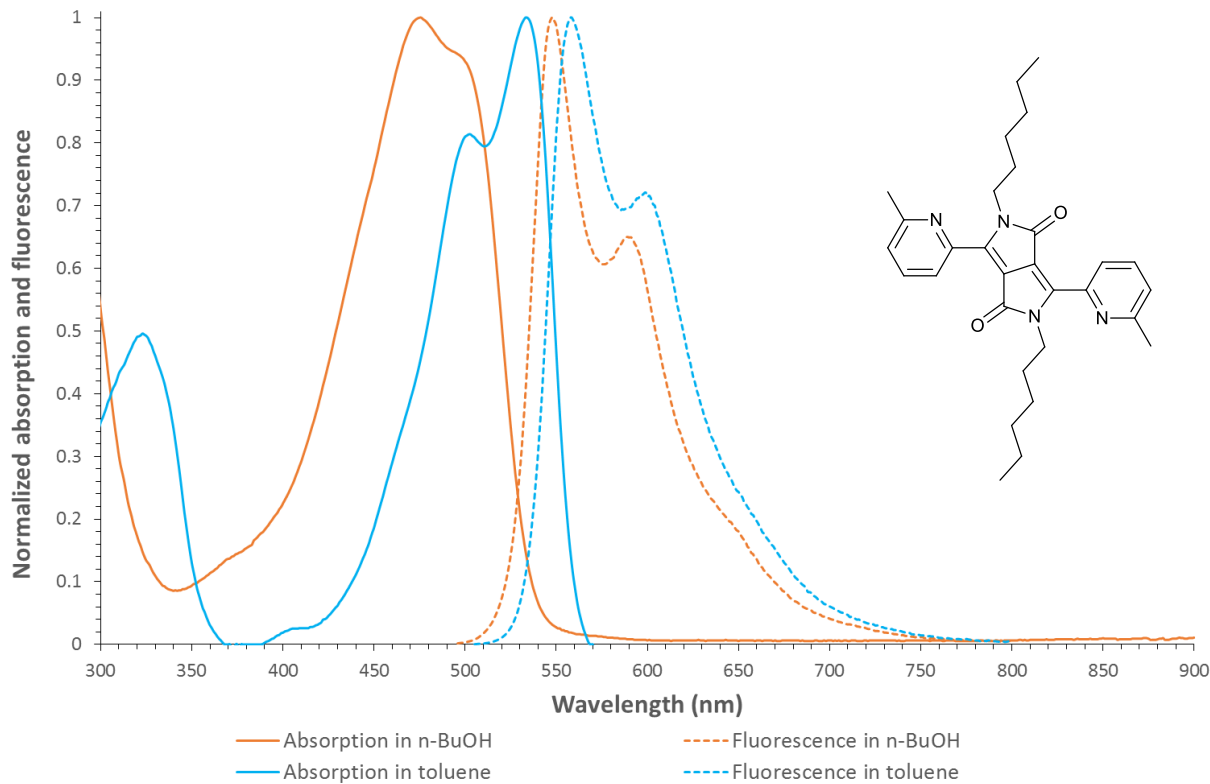

**Fig. S1.15** Normalized absorption and fluorescence of compound **14** in DMF.



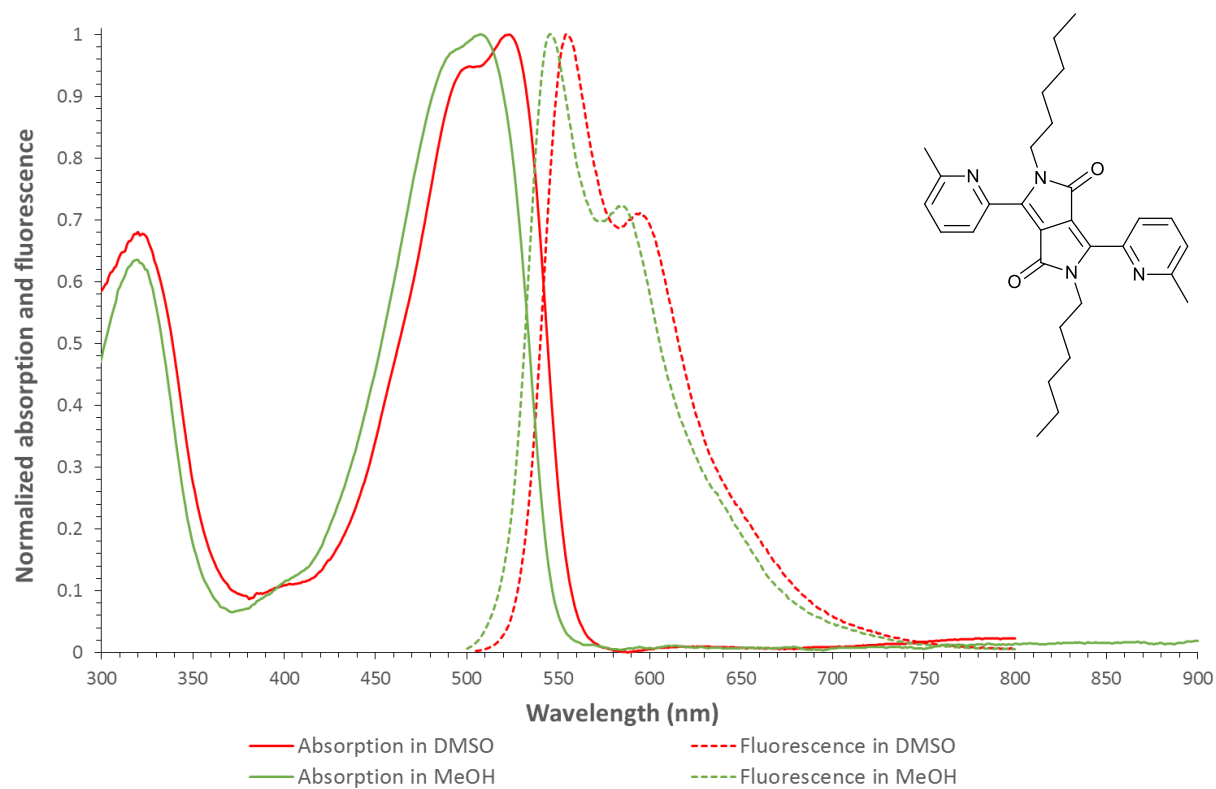

**Fig. S1.16** Normalized absorption and fluorescence of compound **14** in DMSO and MeOH.

## S2. Spectra 1H and 13C NMR for dyes synthesized

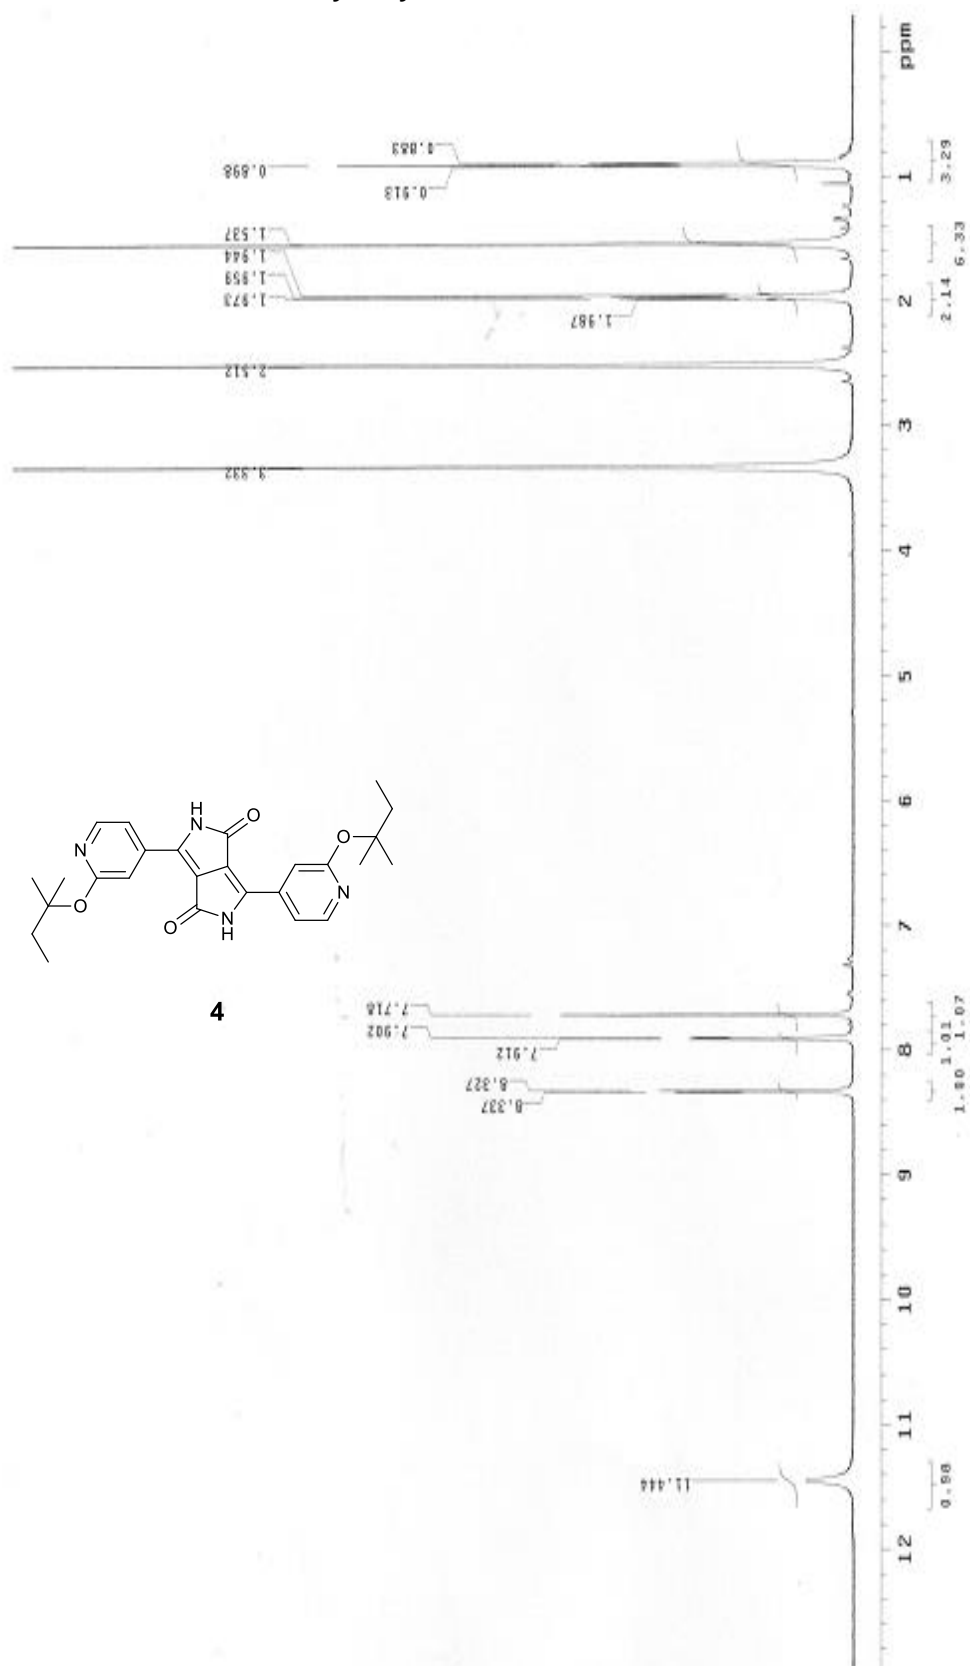

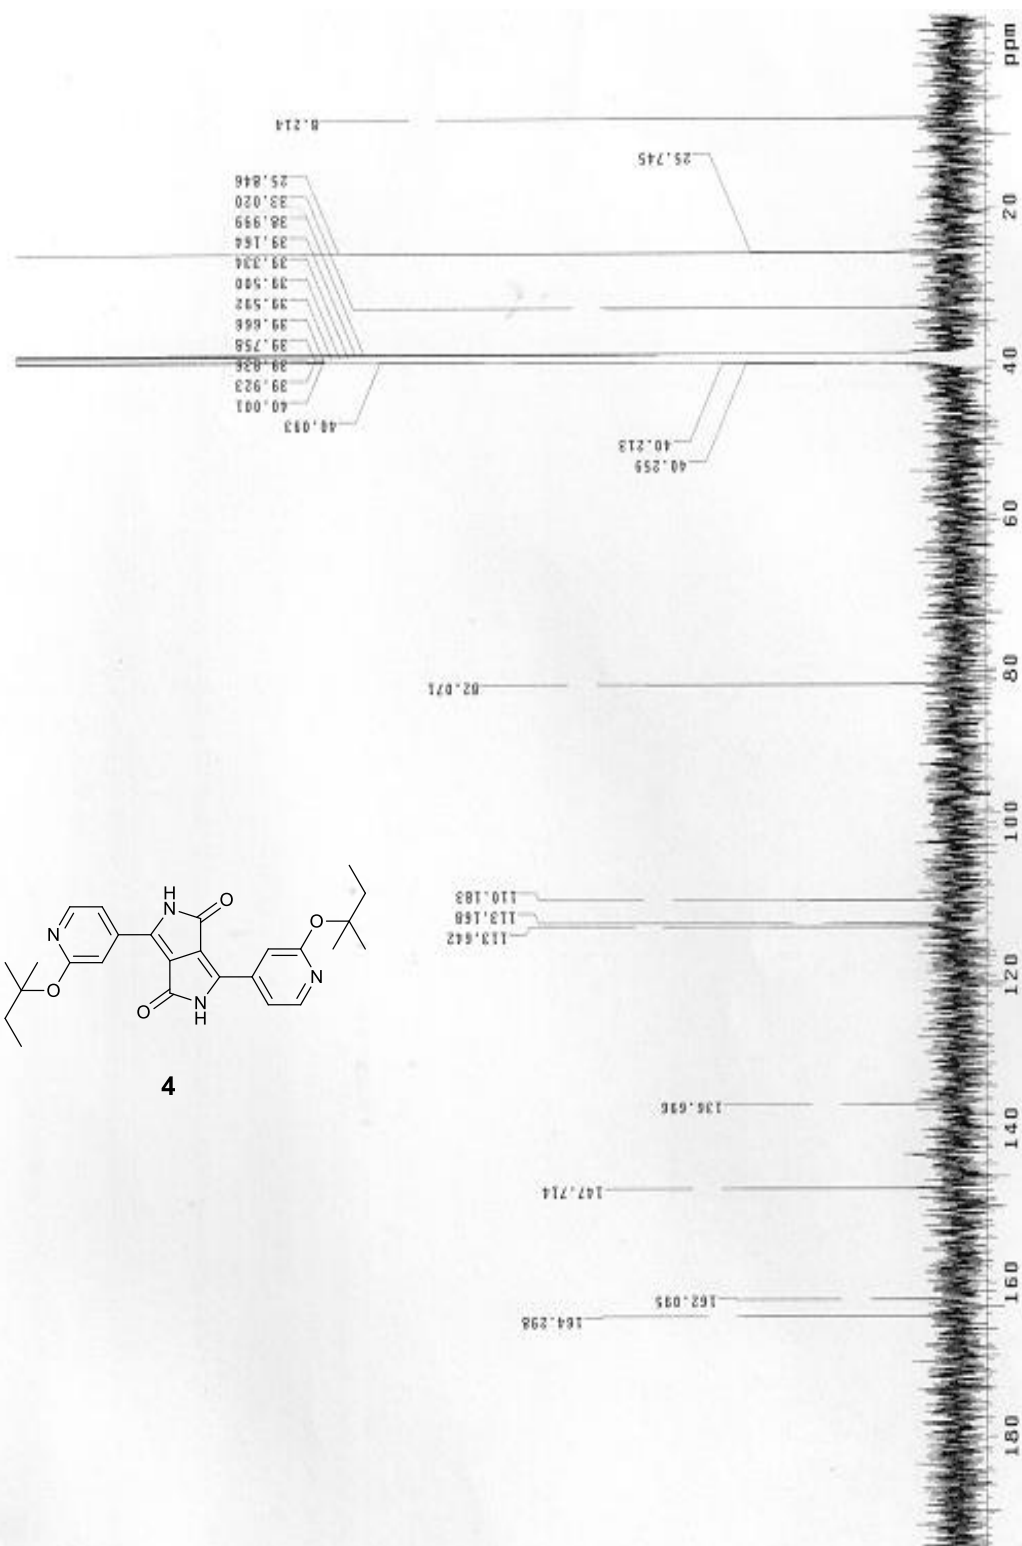

4

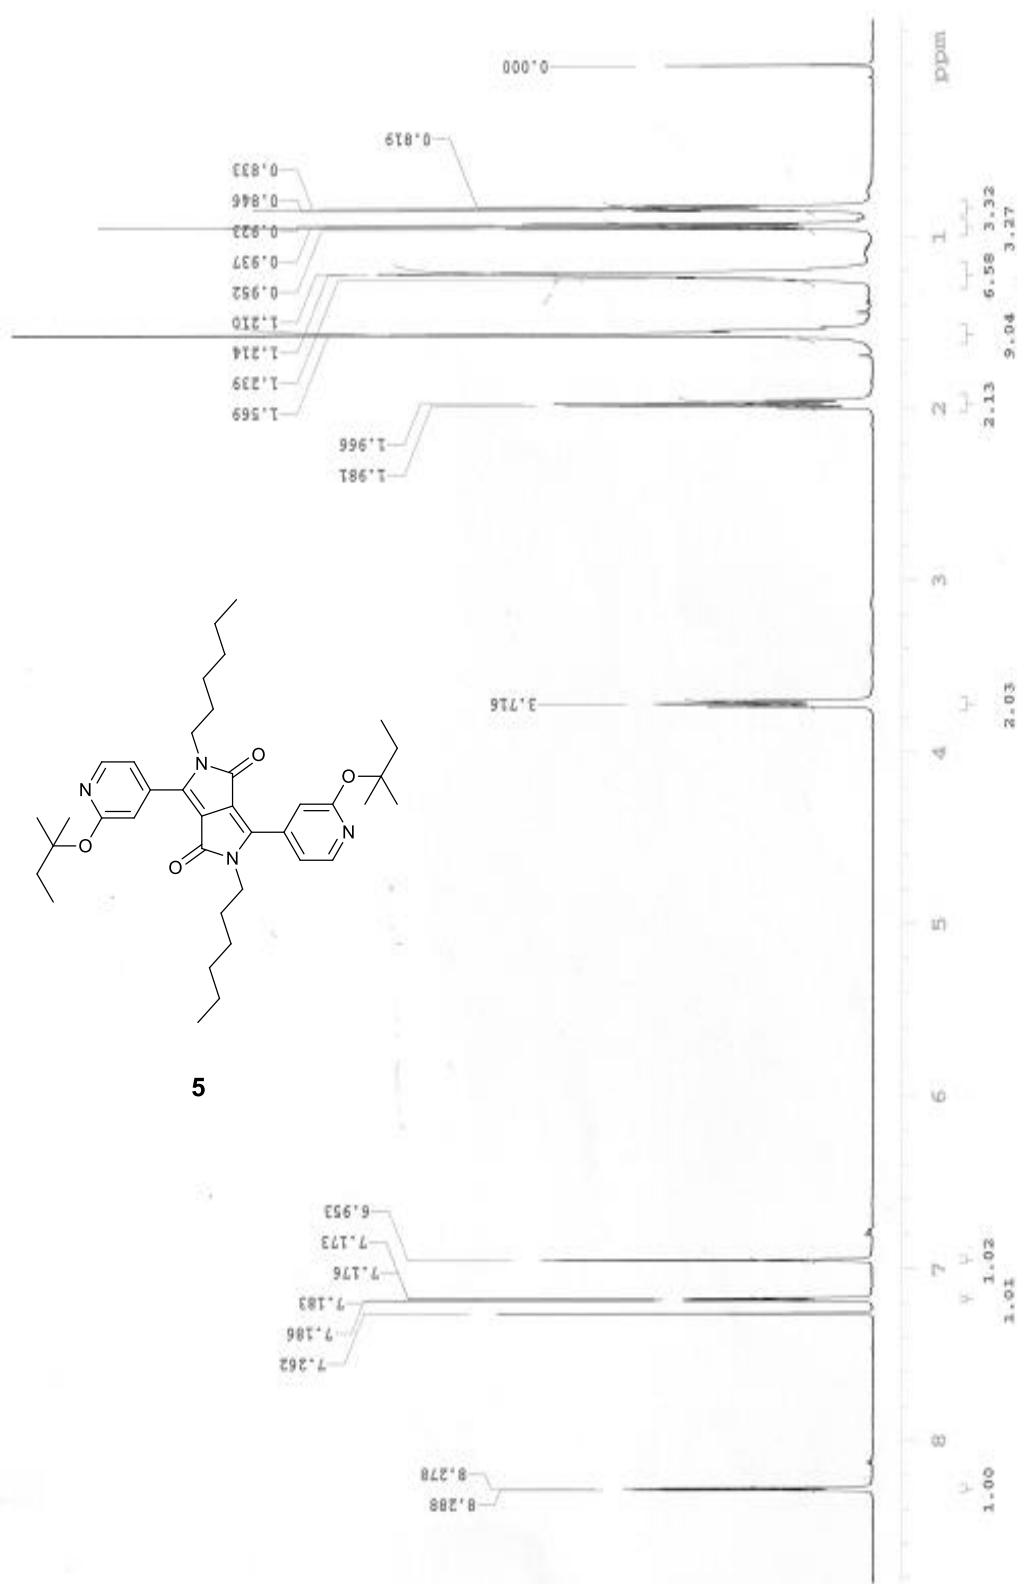

5

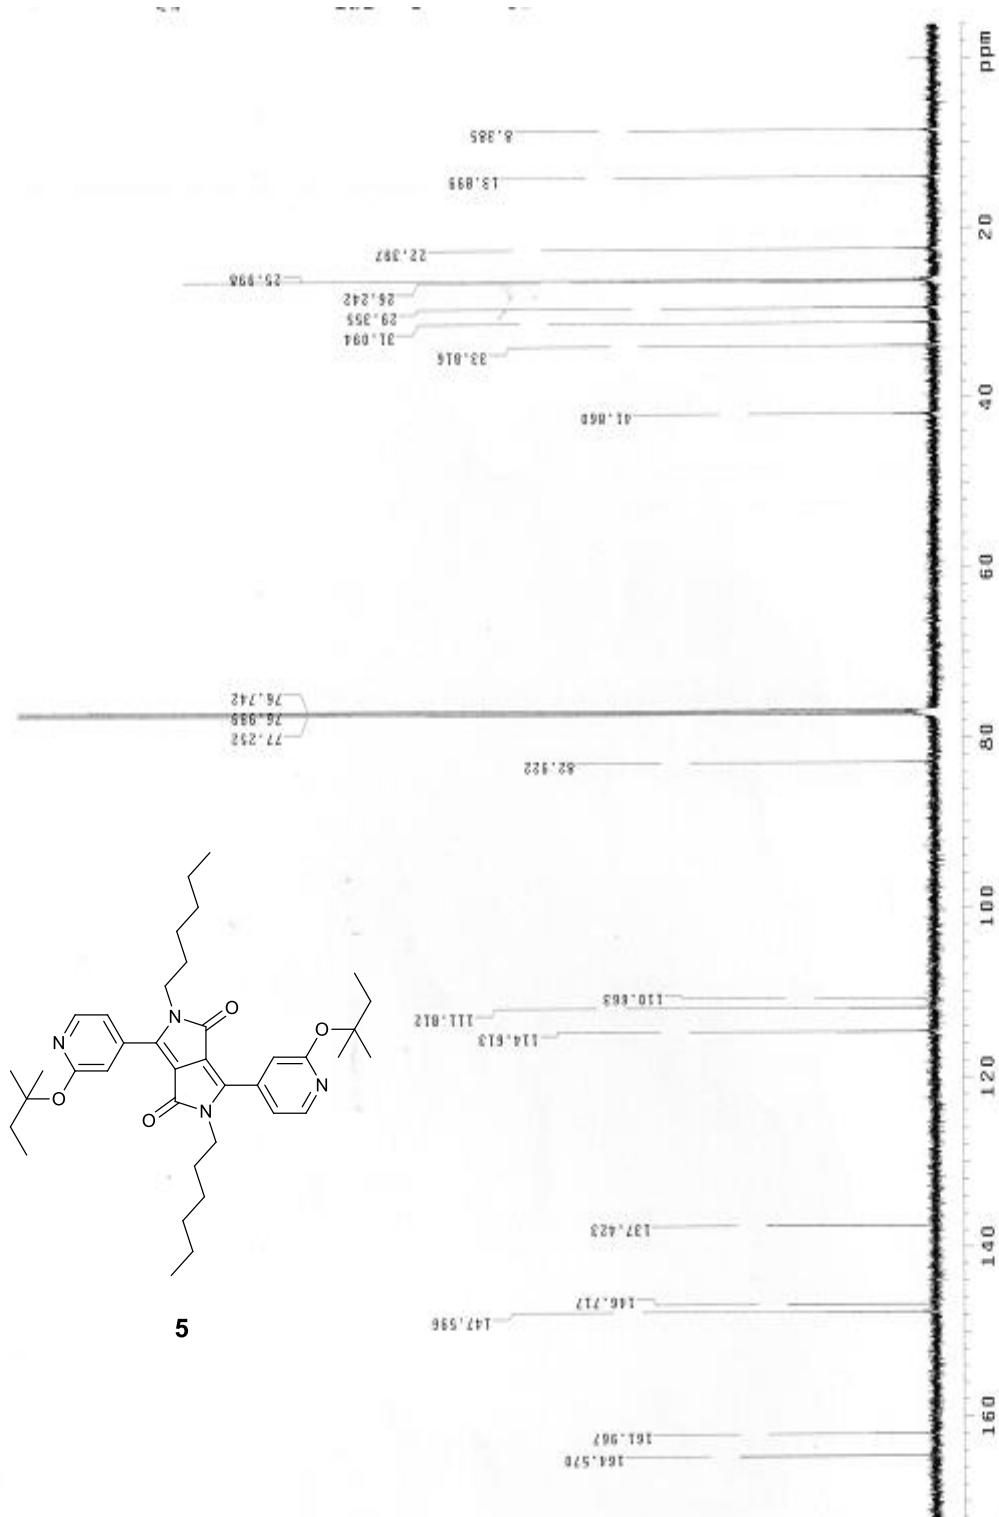

5

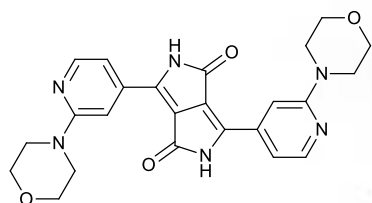

6

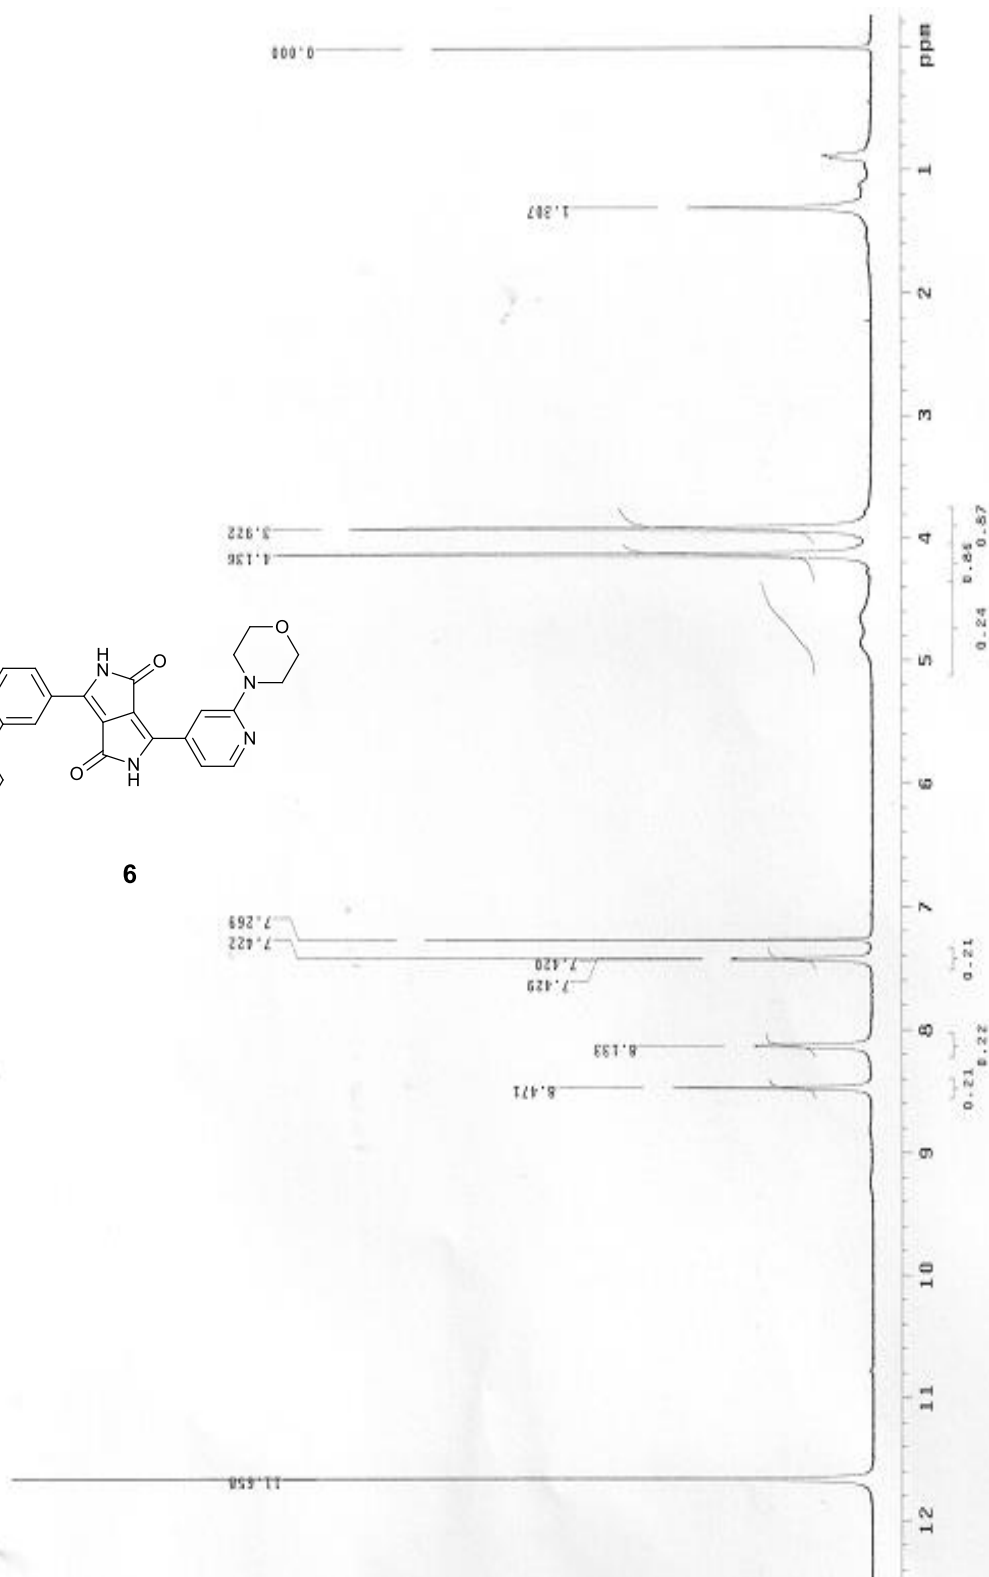

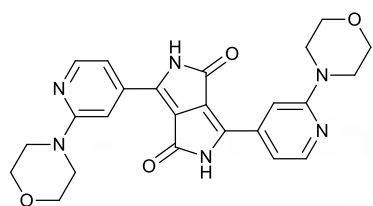

6

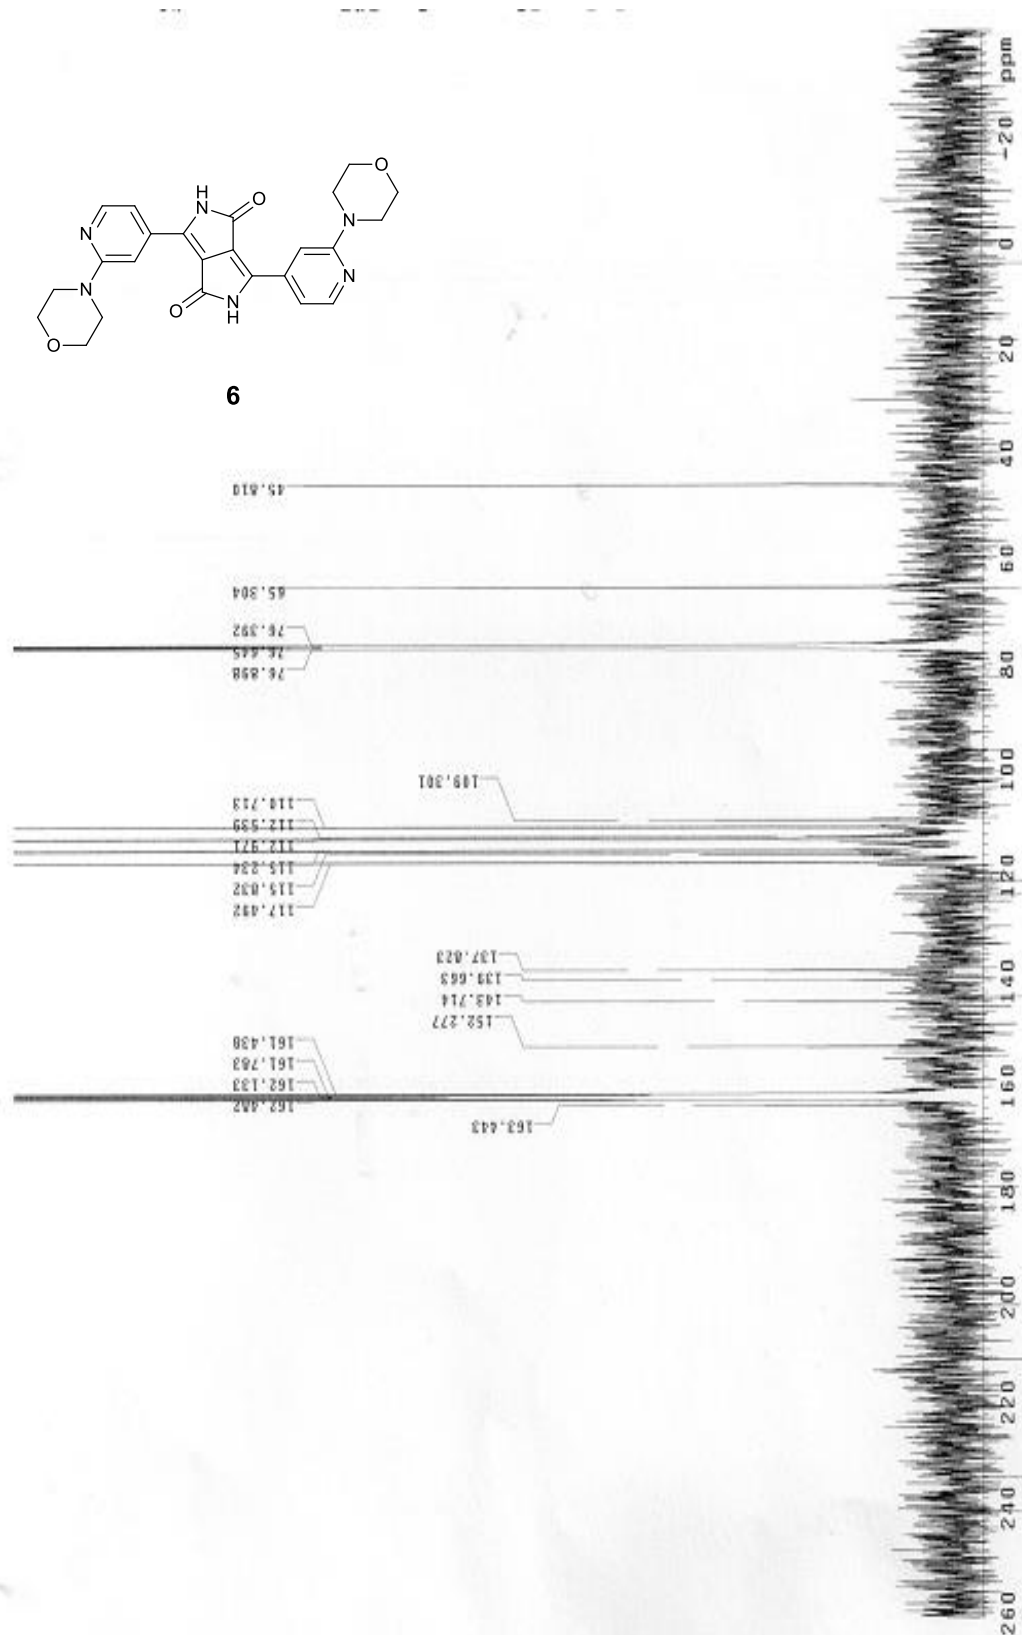

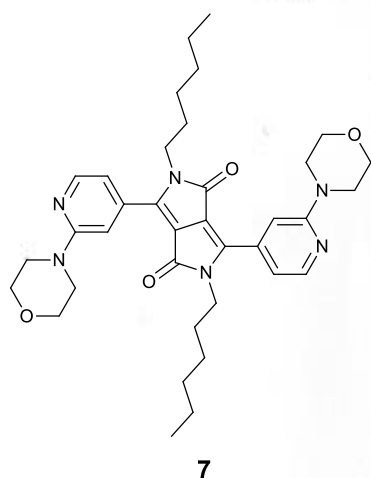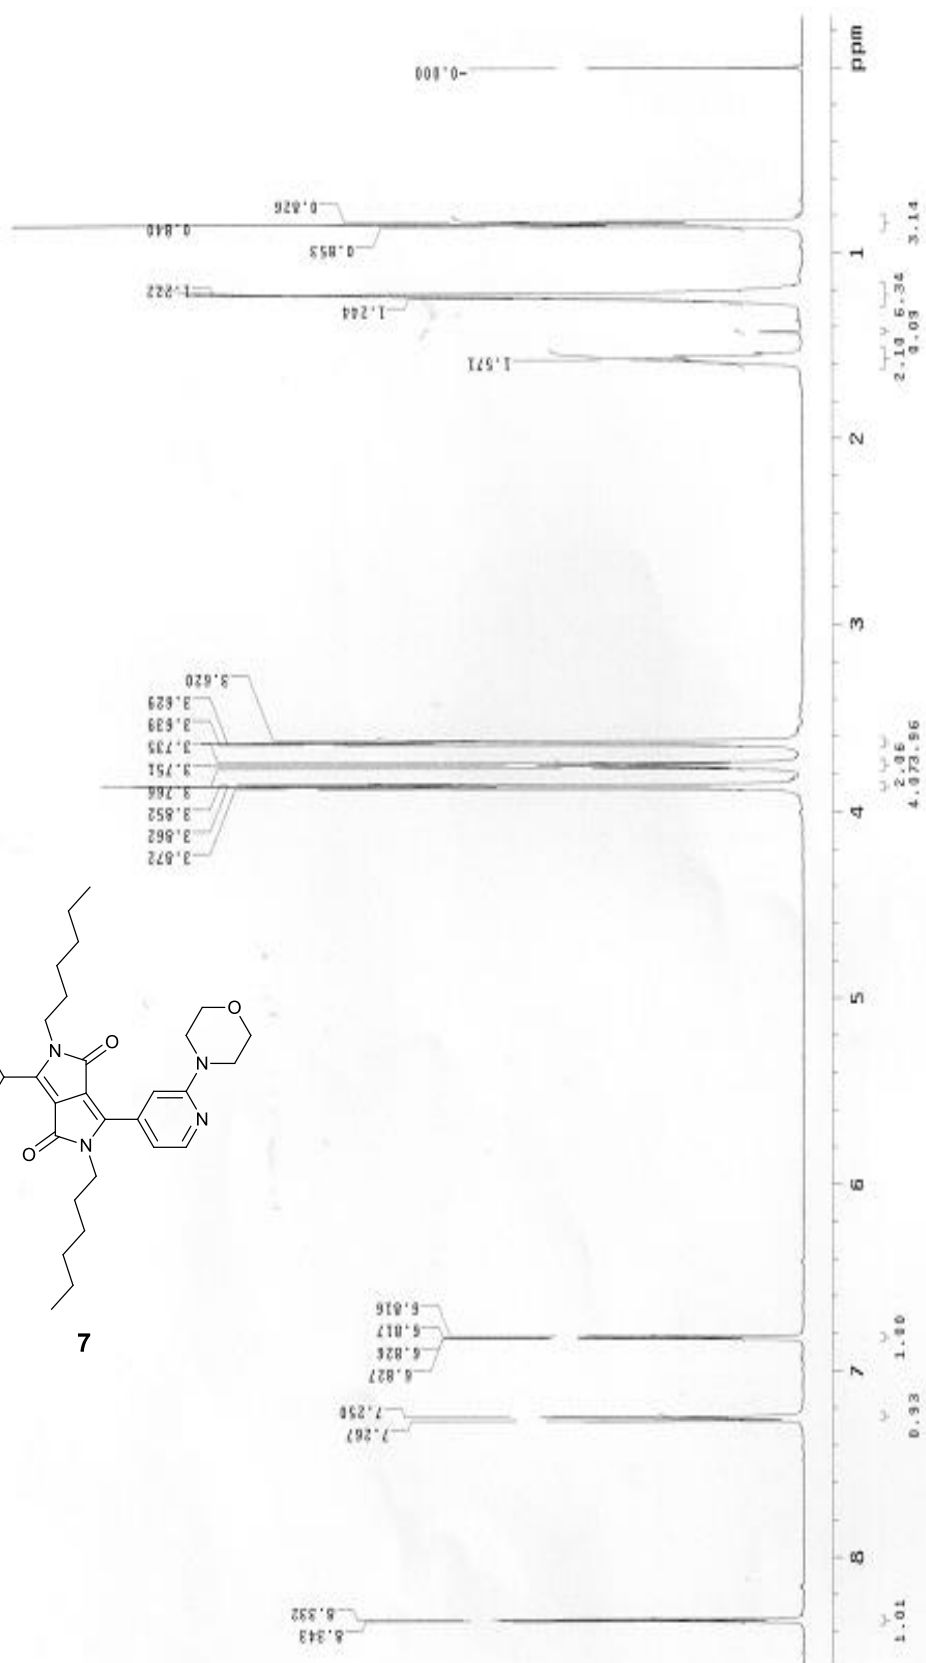



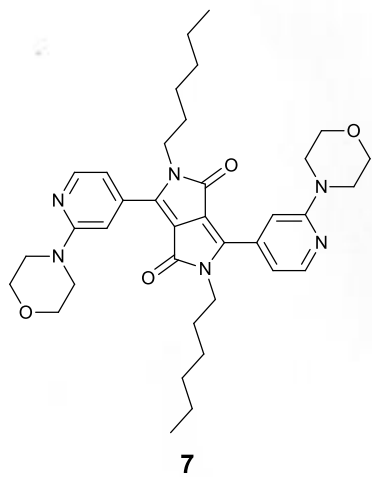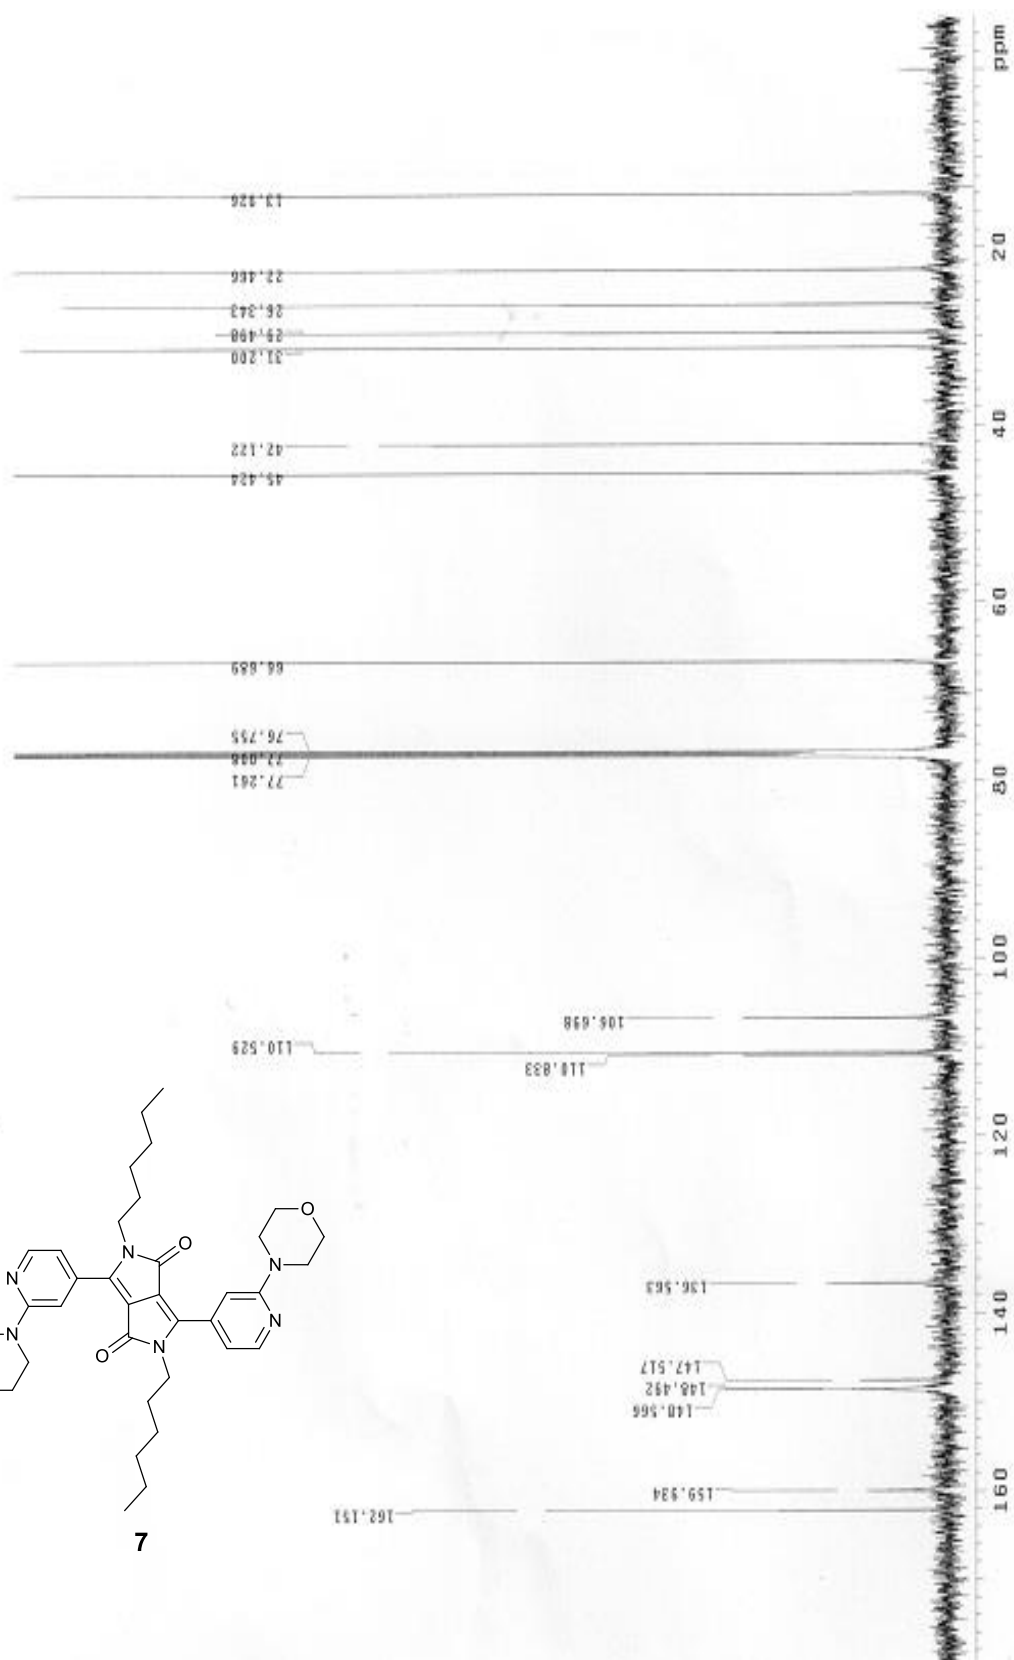

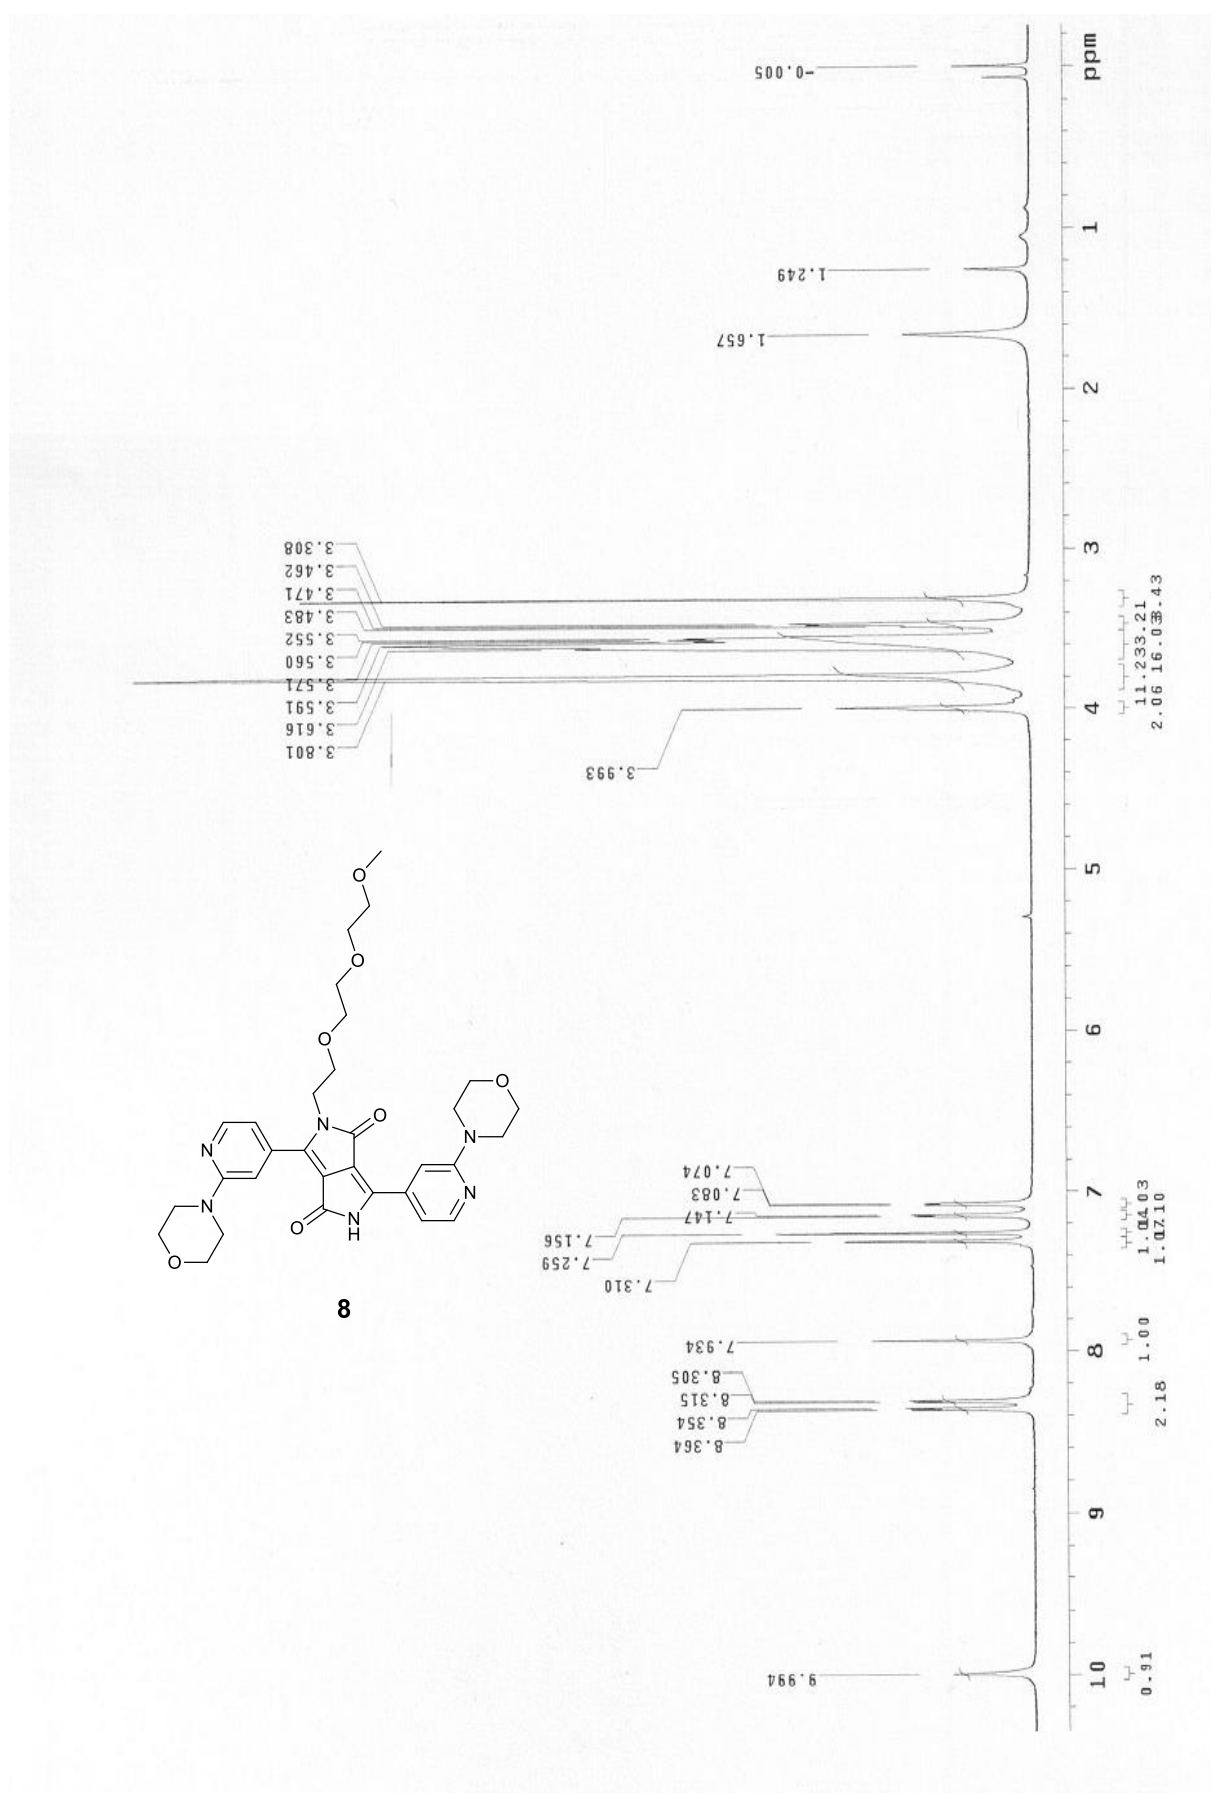

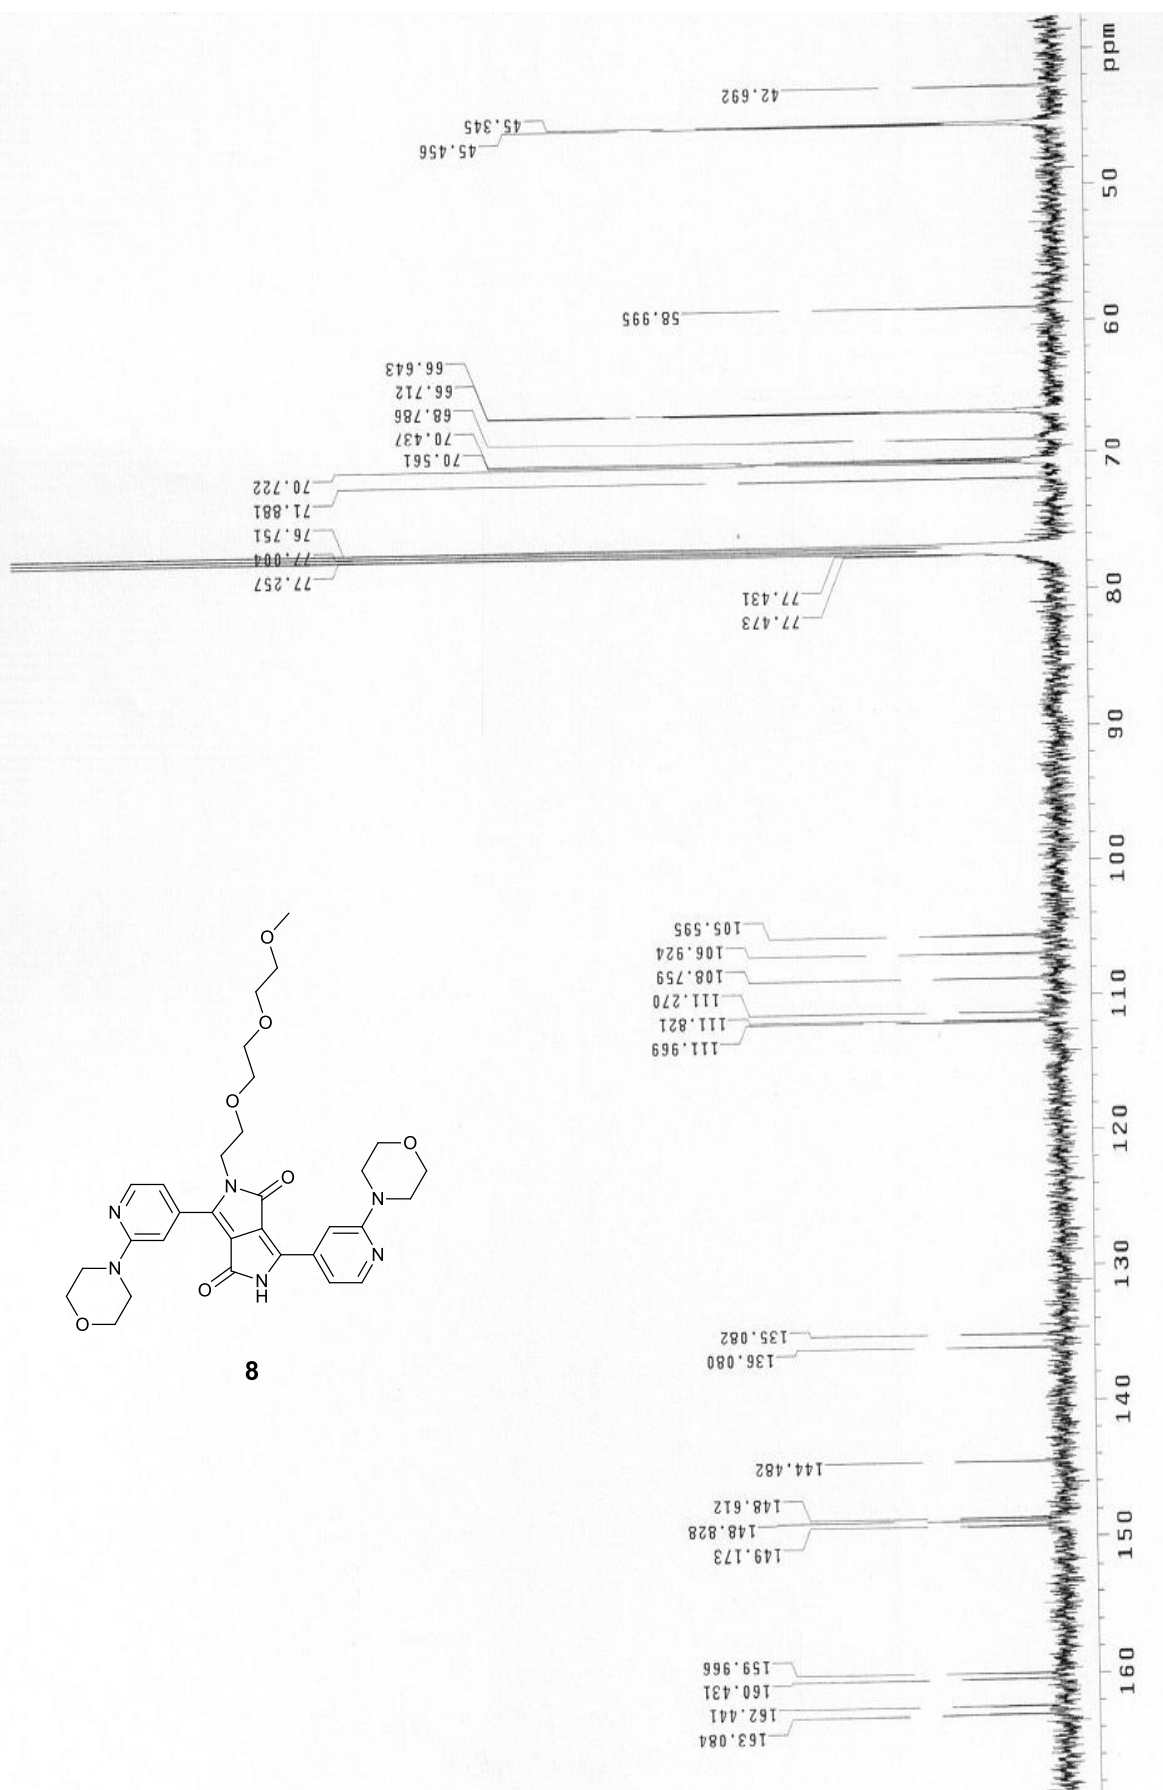

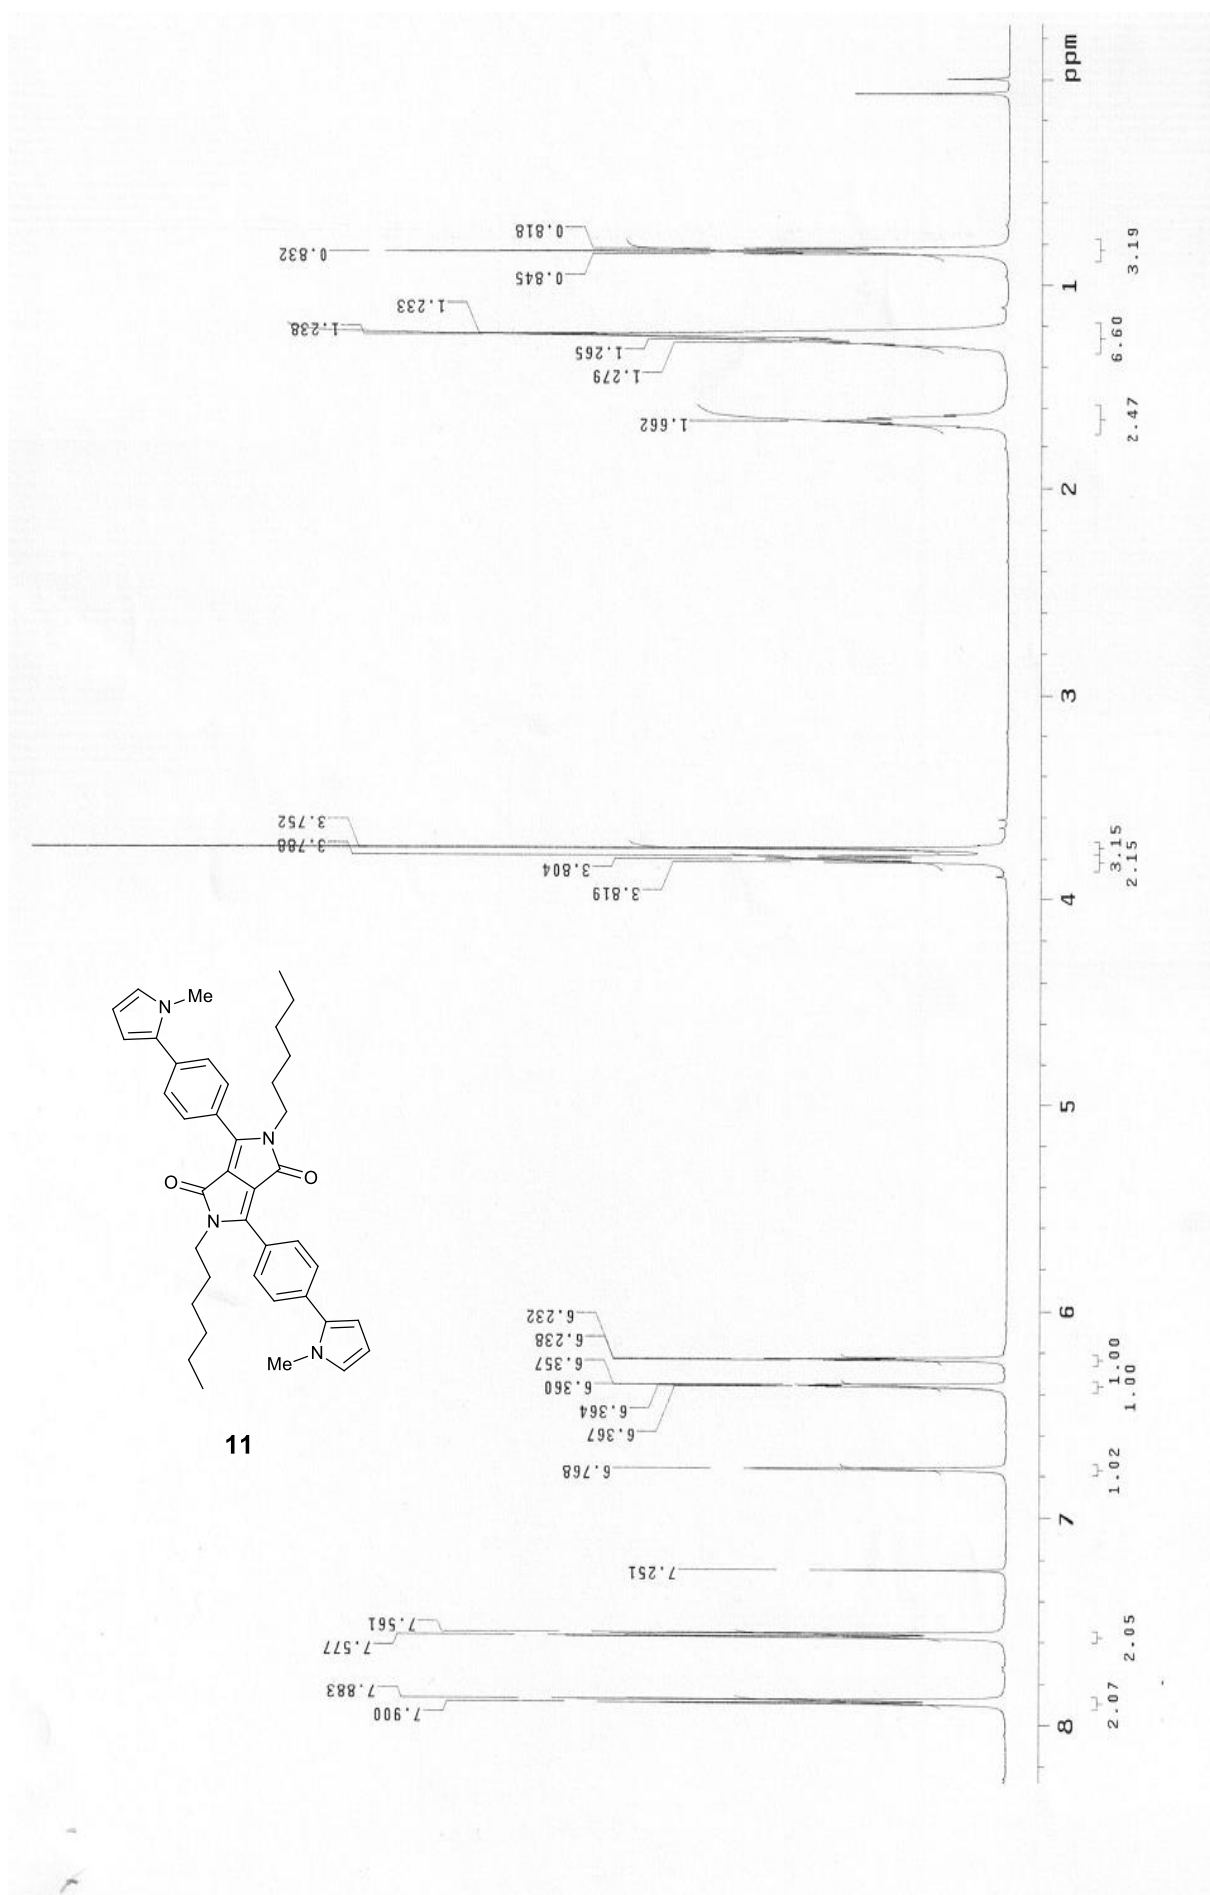

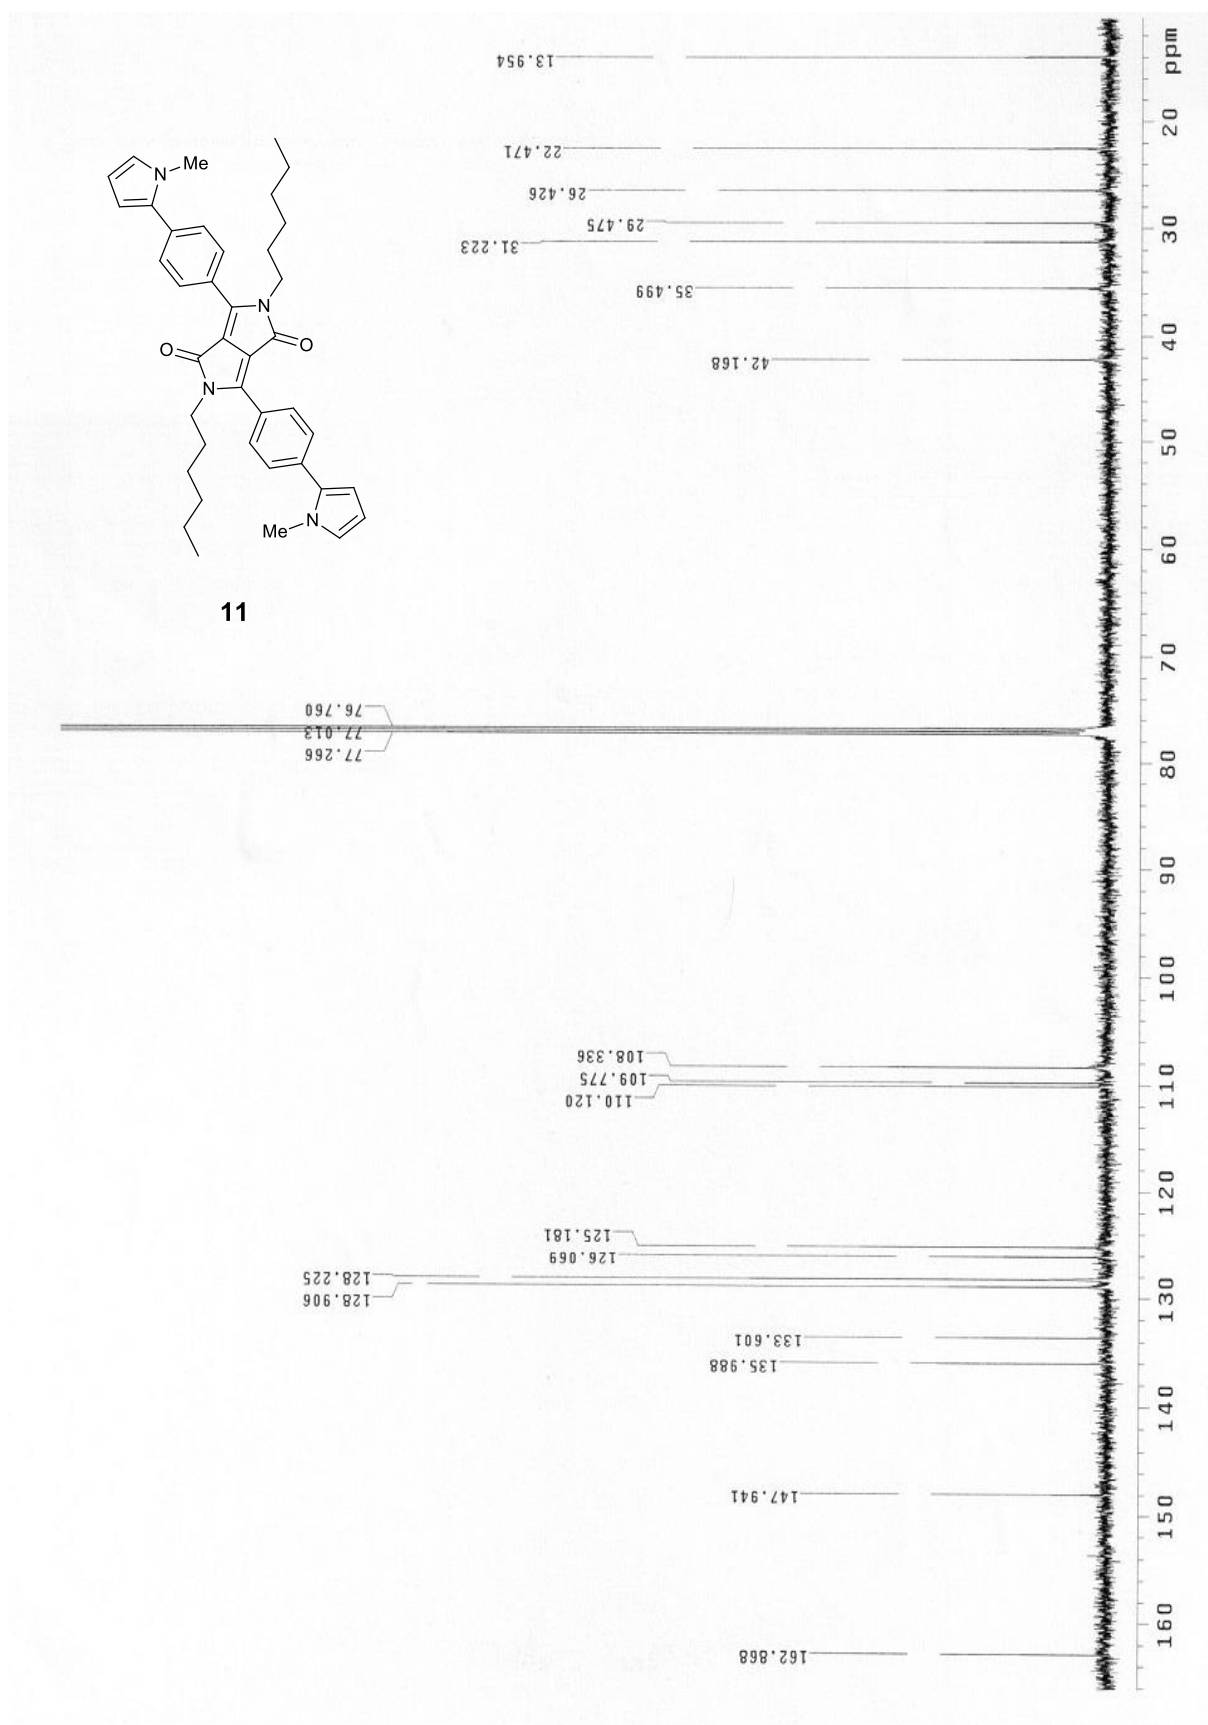

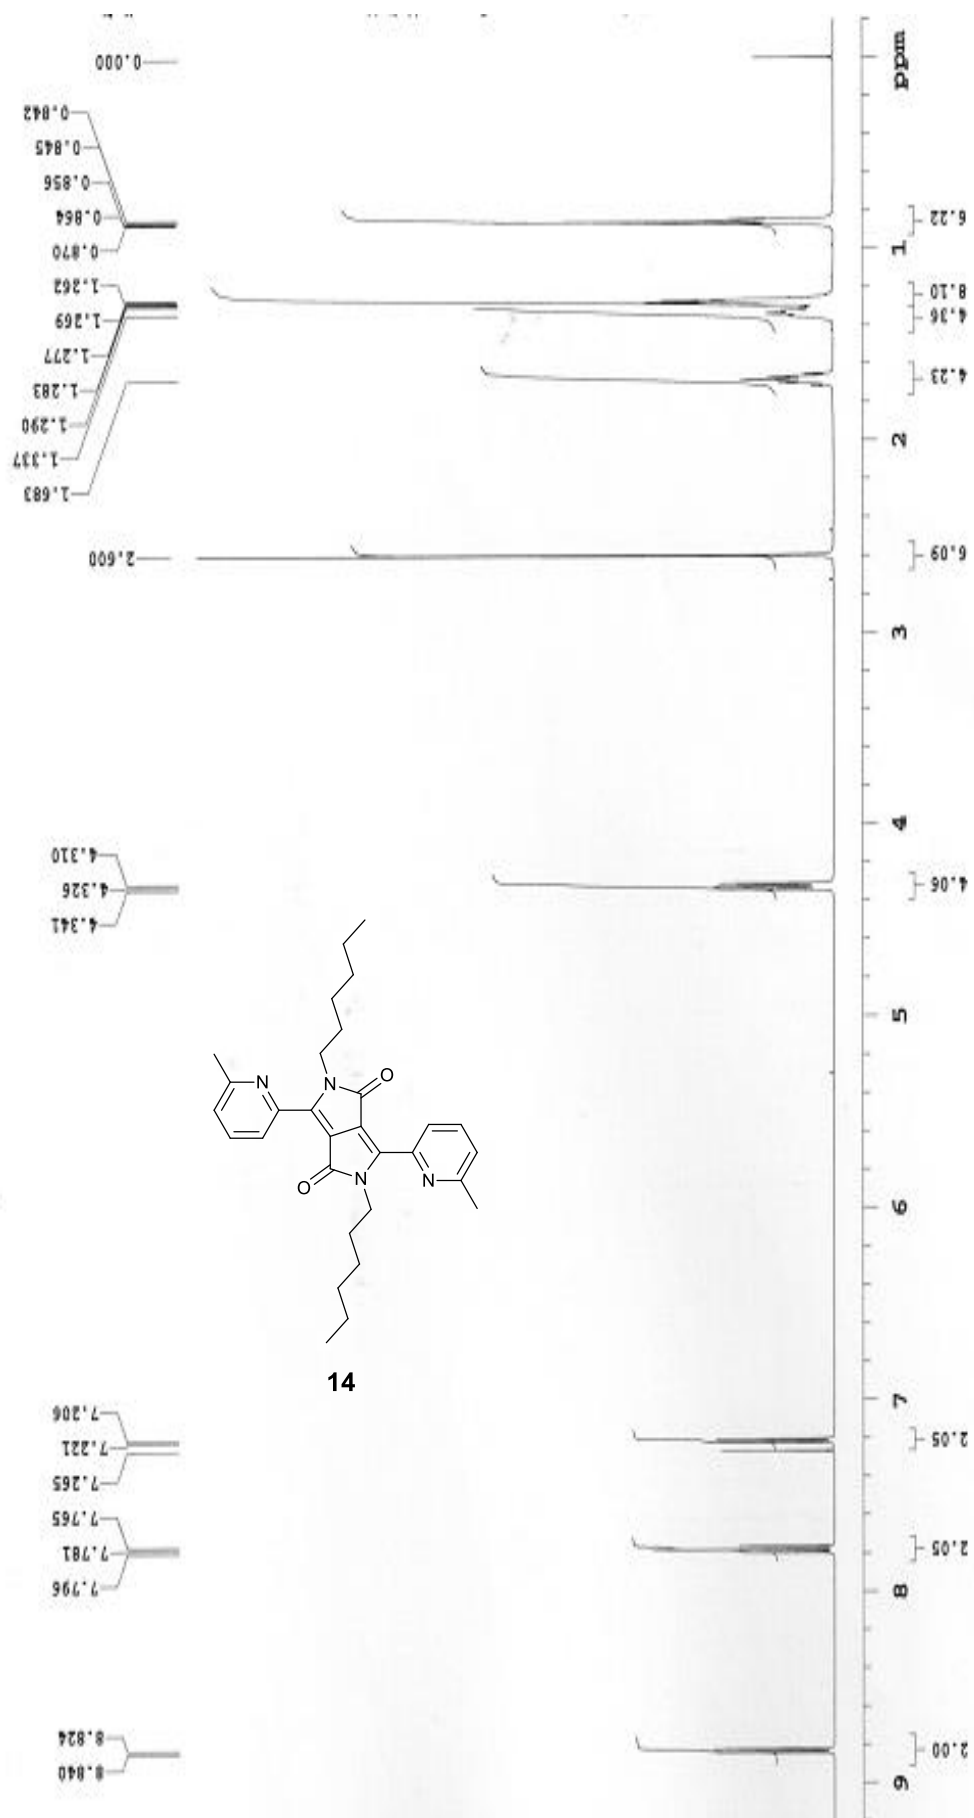

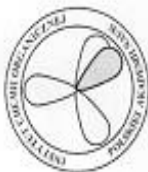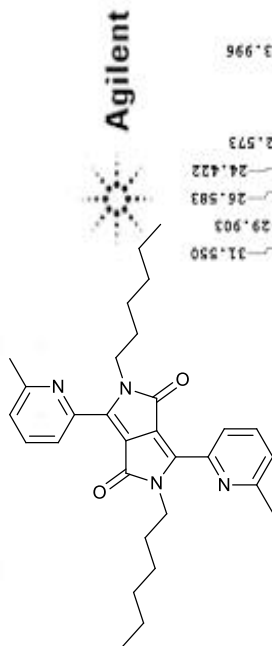

14

Anna Purc  
resp10/var500/AP\_26/AP\_26-C13

Sample Name:  
AP\_26  
Data Collected on:  
Varian-MKS-vnmr500  
Archive directory:

Sample directory:  
Fidfile: CARBON

Pulse Sequence: CARBON (a2pul)  
Solvent: CDCl3  
Data collected on: Aug 25 2013

Temp. 25.0 C / 298.1 K  
Operator: vnmr1

Relax. delay 1.000 sec  
Pulse 45.3 degrees  
Acq. time 1.730 sec  
Width 37878.8 Hz  
688 repetitions  
OBSERVE C13, 125.6810416 MHz  
DECOUPLE H1, 499.8272777 MHz  
Power 38 dB  
continuously on  
WALTZ-16 modulated  
DATA PROCESSING  
Line broadening 1.0 Hz  
SI size 131072

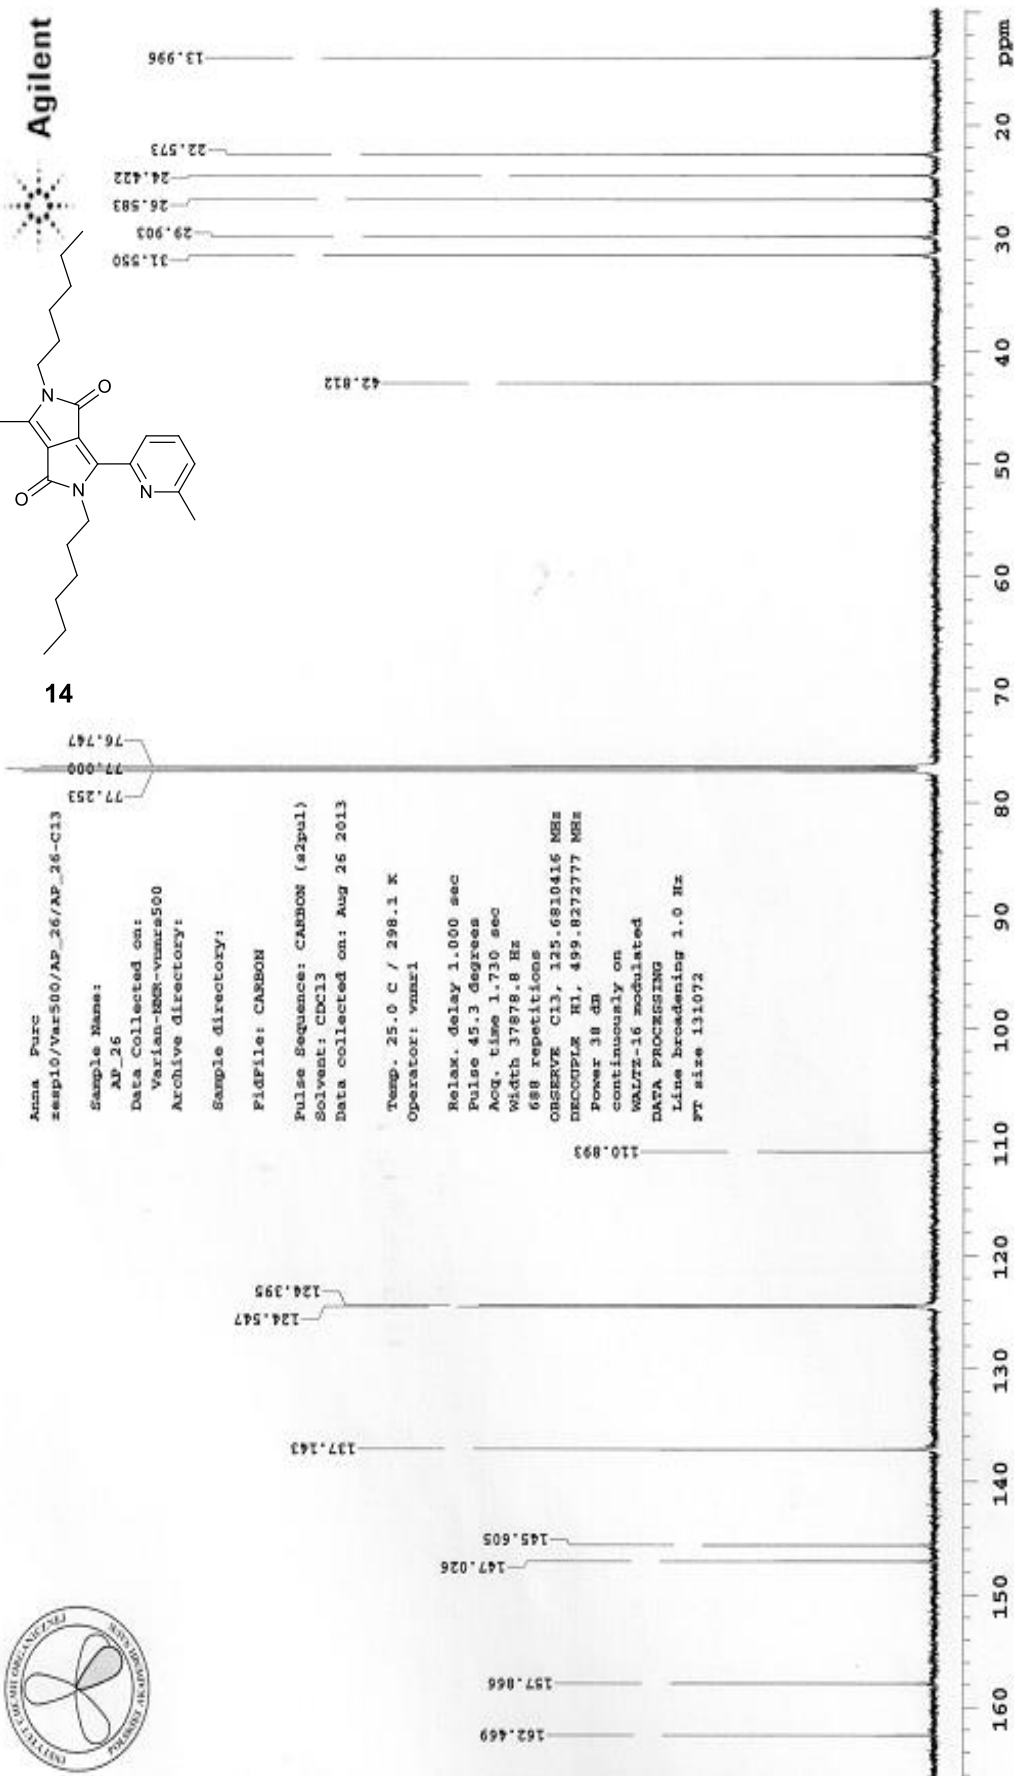

Supplement: c5tc03190g1.pdf [file c5tc03190g1.pdf]
